1 **Theta rhythmicity governs the timing of behavioral and hippocampal responses in humans**  
2 **specifically during memory-dependent tasks**

3  
4 Marije ter Wal<sup>1,6,\*</sup>, Juan Linde Domingo<sup>1,2</sup>, Julia Lifanov<sup>1</sup>, Frederic Roux<sup>1</sup>, Luca Kolibius<sup>1</sup>, Stephanie  
5 Gollwitzer<sup>3</sup>, Johannes Lang<sup>3</sup>, Hajo Hamer<sup>3</sup>, David Rollings<sup>4</sup>, Vijay Sawlani<sup>4</sup>, Ramesh Chelvarajah<sup>4</sup>,  
6 Bernhard Staresina<sup>1</sup>, Simon Hanslmayr<sup>1,5</sup>, Maria Wimber<sup>1,5,\*</sup>

7  
8 <sup>1</sup> School of Psychology & Centre for Human Brain Health, University of Birmingham, Edgbaston, B15  
9 2TT, Birmingham, UK

10 <sup>2</sup> Max Planck Institute for Human Development, 14195, Berlin, Germany

11 <sup>3</sup> Universitätsklinikum Erlangen, 91054, Erlangen, Germany

12 <sup>4</sup> Queen Elizabeth Hospital Birmingham, Edgbaston, B15 2GW, Birmingham, UK

13 <sup>5</sup> Institute of Neuroscience & Psychology, University of Glasgow, G12 8QB, Glasgow, UK

14 <sup>6</sup> Lead contact

15 \*Correspondence: [m.j.terwal@bham.ac.uk](mailto:m.j.terwal@bham.ac.uk); [maria.wimber@glasgow.ac.uk](mailto:maria.wimber@glasgow.ac.uk)

16

17 **1. Summary**

18 Memory formation and reinstatement are thought to lock to the hippocampal theta rhythm,  
19 predicting that encoding and retrieval processes appear rhythmic themselves. Here, we show that  
20 rhythmicity can be observed in behavioral responses from memory tasks, where participants indicate,  
21 using button presses, the timing of encoding or retrieval of cue-object associative memories. We  
22 found no evidence for rhythmicity in button presses for visual tasks using the same stimuli, or for  
23 questions about already retrieved objects. The oscillations for correctly remembered trials center in  
24 the slow theta frequency range (1-5 Hz), while responses from later forgotten trials do not lock to the  
25 behavioral oscillation. Using intracranial EEG recordings, we show that the memory task induces  
26 temporally extended phase consistency in hippocampal local field potentials at slow theta  
27 frequencies, but only for correctly remembered trials, providing a mechanistic underpinning for the  
28 theta oscillations found in behavioral responses.

29

30 **2. Keywords**

31 Theta oscillations, memory encoding, memory retrieval, reaction times, hippocampus, intracranial  
32 EEG, phase locking

### 33 3. Introduction

34 In everyday life, our brains receive a virtually never-ending stream of information that needs to be  
35 stored for future reference or requires integrating with pre-existing knowledge. Extensive research  
36 has identified the hippocampus as the hub where encoding and retrieval of information is coordinated  
37 (for reviews see: Duncan and Schlichting, 2018; Eichenbaum, 2000; O'Reilly and Norman, 2002;  
38 Staresina and Wimber, 2019). Information streams within the hippocampus and between  
39 hippocampus and cortex are thought to be orchestrated by the phase of the theta rhythm (Colgin,  
40 2016; Düzel et al., 2010; Hasselmo and Stern, 2014). Here, we ask whether theta oscillations clock  
41 responses during memory tasks, producing rhythmicity in behavior.

42 During memory formation, to-be-encoded information processed by cortical regions is sent to the  
43 hippocampus and is subsequently uniquely encoded. Conversely, during retrieval, cues trigger the  
44 completion of existing patterns encoded in hippocampus, which elicits full reinstatement of the  
45 memory in associated cortical regions. Both memory encoding and retrieval have been associated  
46 with changes in prominent oscillatory patterns in hippocampal local field potentials (LFPs). The LFP of  
47 rodents is dominated by oscillations in the 4-8 Hz theta frequency band, while a broader low frequency  
48 band is apparent in humans, with frequencies in intracranial recordings often peaking between 1-5 Hz  
49 during memory tasks (Goyal et al., 2020; Griffiths et al., 2019; Jacobs, 2014; Lega et al., 2012). Several  
50 studies have shown that encoding of later-remembered items is accompanied by higher theta power  
51 compared to later-forgotten items, both in scalp- (Guderian et al., 2009; Staudigl and Hanslmayr,  
52 2013) and subdural recordings (Kahana et al., 1999; Sederberg et al., 2003), as well as in human  
53 hippocampus (Fell et al., 2011; Lega et al., 2012; Lin et al., 2017), but see (Herweg et al., 2020).  
54 Similarly, phase-amplitude coupling between theta and gamma oscillations increased during  
55 successful encoding (Lega et al., 2016; Mormann et al., 2005; Staudigl and Hanslmayr, 2013). Finally,  
56 spiking activity of hippocampal neurons was reported to lock to the LFP at theta frequencies (Jacobs  
57 et al., 2007), with stronger locking during successful encoding than for later forgotten items  
58 (Rutishauser et al., 2010).

59 During memory retrieval, theta power increased in cortical areas that are involved in reinstatement  
60 (Jacobs et al., 2006) and synchronization between these areas and hippocampus increased at theta  
61 frequencies (Anderson et al., 2010; Benchenane et al., 2010; Fujisawa and Buzsáki, 2011; Herweg et  
62 al., 2016; Watrous et al., 2013). Intriguingly, recall signals in hippocampus precede reinstatement in  
63 cortex by about one theta cycle, suggesting hippocampus and cortex communicate within theta  
64 'windows' during memory recall (Staresina and Wimber, 2019).

65 There is wide-ranging evidence that information in the rodent hippocampus is structured by the phase  
66 of the theta rhythm. Sequences of past, current and predicted future locations are phase-coded in  
67 theta cycles during movement through a familiar environment (Dragoi and Buzsáki, 2006; Foster and  
68 Wilson, 2007; O'Keefe and Recce, 1993; Skaggs et al., 1996), a finding that has been extended to  
69 temporal event sequences (Allen et al., 2016; Crivelli-Decker et al., 2018; Heusser et al., 2016; Sanders  
70 et al., 2019). In recent human studies, reinstatement of remembered associations was found to be  
71 theta-rhythmic (Kerren et al., 2018), and remembered spatial goal locations have been found to be  
72 represented at different phases of the theta rhythm (Kunz et al., 2019; Watrous et al., 2018).

73 Theoretical work by Hasselmo and colleagues proposes that the theta rhythm (Hasselmo et al., 2002)  
74 separates new information entering hippocampus from reactivated information. Locking of pattern  
75 separation and completion to opposing theta phases avoids destructive interference between new  
76 and existing memories. Indeed, strengthening of synaptic connections (long-term potentiation) is  
77 more likely to occur around the trough of theta cycles (Hyman et al., 2003; Pavlides et al., 1988), while

78 synaptic depression is more pronounced at the peak (Hyman et al., 2003). In line with these findings,  
79 it was shown in rodents that communication of new information from cortex to hippocampus  
80 predominantly occurs around the theta trough (Amemiya and Redish, 2018; Colgin et al., 2009;  
81 Fernández-Ruiz et al., 2017; Lopes-dos-Santos et al., 2018), while retrieval-related spiking activity in  
82 hippocampus is mostly observed around the theta peak (Amemiya and Redish, 2018; Colgin et al.,  
83 2009; Fernández-Ruiz et al., 2017; Lopes-dos-Santos et al., 2018). Intracranial recordings from epilepsy  
84 patients have suggested similar network dynamics, with entorhinal cortex and hippocampus  
85 synchronizing their theta phase during encoding, while hippocampus locked to the downstream  
86 subiculum during retrieval (Solomon et al., 2019). Furthermore, optogenetically suppressing neural  
87 activity during task-irrelevant phases of the theta oscillation improves performance (Siegle and  
88 Wilson, 2014), demonstrating that theta phase has a functional link to memory performance.

89 Consistent locking of encoding and retrieval processes to the theta rhythm predicts that these  
90 processes appear as rhythmic. Rhythmicity might therefore be visible in behavioral markers that  
91 depend on long-term memory. To our knowledge, no work has tested for rhythmicity in long-term  
92 memory-dependent, overt behavior. However, studies on attentional scanning suggest that oscillatory  
93 activity can manifest in behavior (VanRullen, 2016). In both monkey and human, visual attention to a  
94 cued location periodically switched towards the periphery, to allow for the prioritization of the cued  
95 location while maintaining the flexibility to detect changes in other parts of the visual field.  
96 Intriguingly, the effect of attentional scanning was visible in behavioral performance, with the hit rate  
97 for detection at the cued location of the participants waxing and waning at a theta rhythm (Busch and  
98 VanRullen, 2010; Fiebelkorn et al., 2013, 2018; Helfrich et al., 2018; Landau and Fries, 2012).

99 Here, we ask whether the theta rhythmicity observed in so many studies in humans and rodents  
100 translates into an oscillatory modulation of behavior during memory tasks. We analyze responses from  
101 hundreds of participants completing a memory task, in which they pressed buttons to indicate the  
102 exact time points at which they formed or recalled an associative memory. We find significant  
103 oscillations in both encoding and retrieval button presses, with frequencies matching the previously  
104 reported lower theta frequency band (1-5 Hz, Jacobs, 2014; Lega, Jacobs, & Kahana, 2012). No  
105 oscillatory signatures were present in button presses from task phases that do not depend on  
106 memory. In addition, incorrect trials do not lock to the rhythm identified for correct trials. To establish  
107 a mechanism for our behavioral findings, we analyze hippocampal LFPs recorded in epilepsy patients,  
108 and find temporally extended phase locking in the low theta range during memory-dependent task  
109 phases, which is present for correct but not incorrect trials. Finally, we show that encoding and  
110 retrieval trials show maximal phase alignment at opposite phases of the theta rhythm. Together, our  
111 results demonstrate that hippocampus-dependent, theta-rhythmic memory processes can be  
112 detected in human behavior.

## 113 4. Results

114

### 115 4.1. Button presses indicate the timing of memory-dependent and -independent processing

116 In this study we asked whether signatures of hippocampal rhythms can be found in behavioral  
117 responses during the encoding and retrieval of memories. We analyzed the data from 226 participants  
118 who performed one of several related associative memory tasks. The memory tasks consisted of  
119 multiple blocks with encoding, distractor and retrieval phases (Figure 1A). During encoding phases,  
120 participants were shown a cue (verb or scene image), followed by a stimulus (photo or drawing of an  
121 object), and pressed a button when they made an association between cue and stimulus. This  
122 provided us with an estimate of the timing of successful memory formation (Encoding button press).  
123 During retrieval phases, participants were shown the cues in random order and were asked to  
124 remember the associated objects. One group of participants (group 1; n=71) indicated the moment  
125 they remembered the object by pressing a button (Retrieval button press) and then answered one or  
126 two catch questions (e.g. 'animate or inanimate?') about the already reinstated object (Catch-after-  
127 retrieval button press). A second group (group 2; n=155) was shown the catch question before the cue  
128 appeared. This group thus needed to mentally reinstate the object and press the button as soon as  
129 they were able to answer the question (Catch-with-retrieval button press), and hence this button press  
130 indicated the time of subjective memory retrieval in this group. Each participant memorized between  
131 64 and 128 cue-object pairs. Objects, cues and catch questions varied between experiments; for  
132 details see Methods and Table S1.

133 In order to separate memory processes from perceptual elements of the task, we asked a separate  
134 group (group 3; n=95) to perform visual control tasks (Figure 1B). Participants were shown a question  
135 followed by an object, and answered the question by pressing a button (Visual button press). The  
136 same questions and objects were used as for the memory tasks. Note that the button presses from  
137 the visual task do not depend on episodic memory, as they pertain to objects that are constantly  
138 visible. Answers to the catch question for memory group 1 (Catch-after-retrieval button press) are also  
139 not expected to rely on hippocampal memory retrieval, since they are asked after objects are already  
140 (more or less fully) reinstated. Note that answering the catch questions after retrieval is, however,  
141 likely to rely on maintenance of the successfully retrieved object in working memory. In this  
142 manuscript we use the term memory-dependent as relying on hippocampal dependent long-term  
143 memory.

144 We analyzed the performance of the participants based on the catch questions. Participants who  
145 performed at chance level, as assessed by a binomial test, were excluded from further analyses (n=12  
146 for memory task; n=0 for visual task, see Figure S1A). In addition, 32 (1) participants with sufficient  
147 memory performance had a low trial count for the encoding (retrieval) phase due to trial time-outs,  
148 and as a result were excluded for encoding (retrieval) phase analyses (Figure S1A). The remaining  
149 participants (Figure 1C) performed the tasks well, with an average performance of 84.0% (range 56.3-  
150 100%) for the memory groups and 96.3% (range 78.2-100%) for the visual group (Figure S1B). For the  
151 number of responses and reaction times per task phase see Figure S1 and Table S3.

152

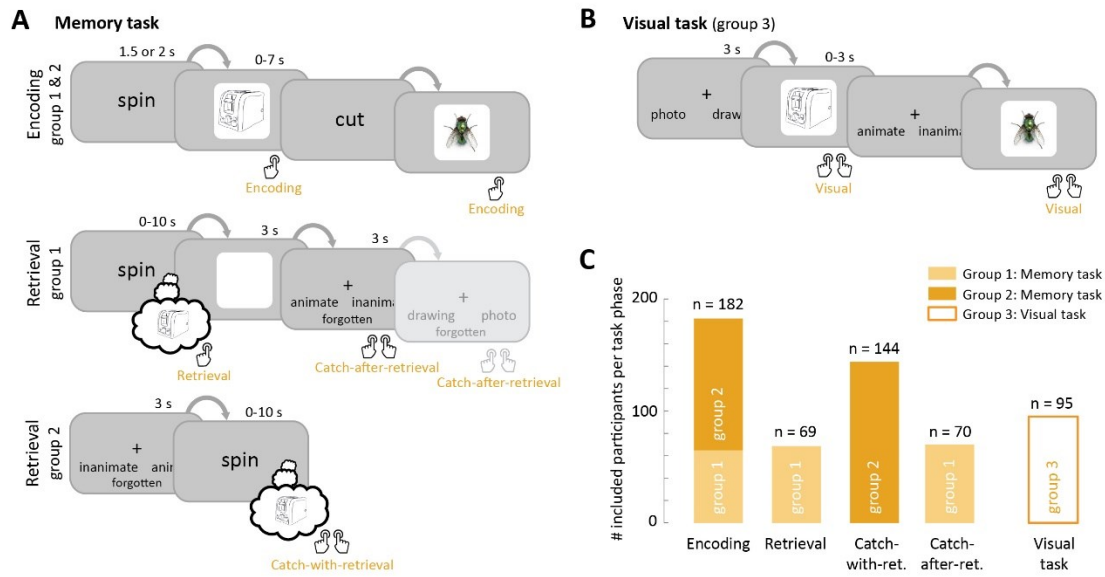

153

154 **Figure 1.** Button presses indicate the timing of memory-dependent and -independent processing. **A:**  
 155 Structure of the memory task. Two groups of participants (group 1 & 2; n=226) completed blocks  
 156 consisting of an encoding phase (top row) in which they associated cues ('spin', 'cut') to objects, a  
 157 distractor phase (not shown), and one of two versions of a retrieval phase (bottom rows), in which  
 158 they answered catch questions about remembered objects ('animate or inanimate?', 'photo or  
 159 drawing?'); **B:** Structure of the visual task. A separate group of participants (group 3; n=95) answered  
 160 questions about objects on the screen, using the same questions and stimuli as the memory task; **C:**  
 161 Number of participants that were included in further analyses, after exclusion of participants with a  
 162 high number of incorrect and/or timed-out trials (Figure S1A). Note that participants in group 1  
 163 contributed button presses to 3 task phases (Encoding, Retrieval and Catch-after-retrieval), group 2  
 164 contributed to 2 (Encoding and Catch-with-retrieval) and group 3 to 1 task phase (Visual).

165 4.2. Oscillatory patterns can be detected in behavioral responses using the O-score

166 The button presses from the memory tasks provided us with estimates of when participants formed  
167 and reinstated memories on each trial. In Figure 2A the button presses from all retrieval trials of one  
168 example participant are shown, as well as the smoothed response density across trials. We asked  
169 whether the response densities showed oscillations, as suggested by the trend-removed trace in  
170 Figure 2A (right), and whether these patterns differed between memory-dependent and -independent  
171 task phases. To address this we used the Oscillation score (Muresan et al., 2008), a method developed  
172 to assess oscillations in spike trains. This procedure identifies the dominant frequency in the response  
173 time stamps, and provides a normalized amplitude at this frequency: the O-score. We computed O-  
174 scores for correct responses per participant and task phase.

175 In brief, after removal of early and late outliers (Figure 2B, step I), we computed the O-score as follows  
176 (Figure 2B, blue box): The auto-correlation histogram (ACH) was computed for the button presses  
177 from correct trials and smoothed with a Gaussian kernel ( $\sigma=2$  ms) to reduce noise. Then the central  
178 peak of the ACH was removed. All remaining positive lags were Fourier transformed and, within a  
179 frequency range of interest (adjusted per participant based on the signal length (lower bound) and  
180 number of responses (upper bound), with a minimum of 0.5 Hz and maximum of 40 Hz), the frequency  
181 with the highest magnitude was found. The O-score was computed by dividing the peak magnitude by  
182 the average of the entire spectrum.

183 The O-score indicates how much the peak frequency stands out against other frequencies, but does  
184 not take into account the overall response structure in the button presses (grey trend curves in Figure  
185 2) and the limited number of data points, which could introduce a frequency bias. To account for this,  
186 we fitted a trend curve for each participant and generated 500 random series of button presses based  
187 on this structure, with the same number of data points as the original dataset (Figure 2B, II). We then  
188 computed the O-score for the random datasets at the peak frequency from the intact data and Z-  
189 transformed the original O-score against the 500 reference O-scores (Figure 2B, III). This allowed us to  
190 statistically assess the oscillatory strength for each participant and task phase, as well as perform  
191 second level statistical assessments across participants. We validated the performance of the O-score  
192 and Z-scoring methods using simulated data (Supplementary Results and Figure S5).



## A Example participant

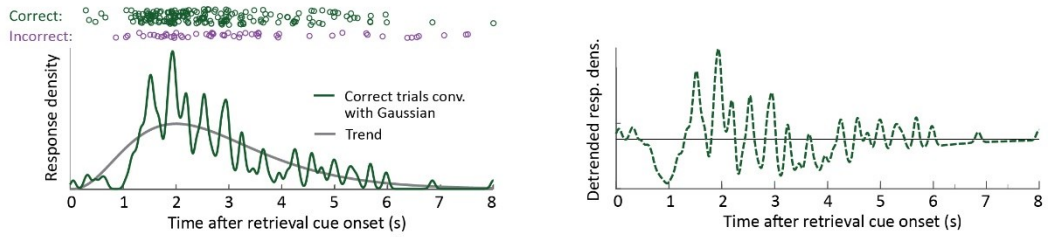

## B Oscillation score for example participant from panel A

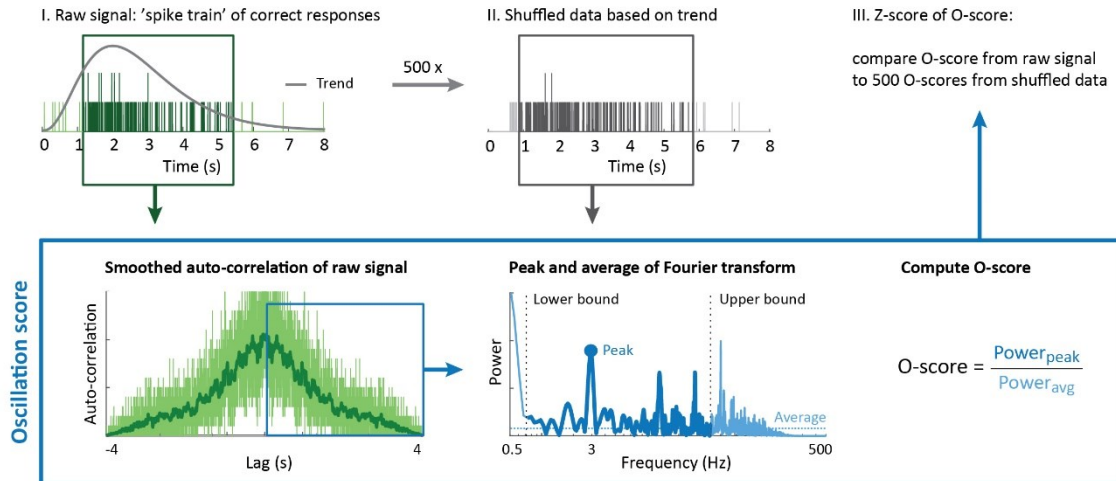

193  
194  
195  
196  
197  
198  
199  
200  
201  
202

**Figure 2.** Oscillatory patterns can be detected in behavioral responses using the O-score. **A:** Timing of retrieval button presses for an example participant. Each circle is one button press, with correct trials in green and incorrect trials in purple. Convolution of the correct trials with a Gaussian kernel (left panel, solid green line) reveals an overall trend in response density (left panel, grey line) as well as an oscillatory modulation (right panel, dashed green line); **B:** Step-by-step representation of the Oscillation score method, for the participant from panel A. O-scores were computed for the original data (dark green) and 500 reference datasets with the same overall response trend (grey) following the procedure from (Muresan et al., 2008), summarized in the blue box. For details see main text and Methods.

### 203 4.3. Behavioral responses oscillate at theta frequencies for memory-dependent task phases

204 O-scores were high for encoding and retrieval button presses from both versions of the memory task  
205 (Figure 3A). Each of the memory-dependent task phases reached significance across participants,  
206 specifically Encoding ( $t(181)=6.20$ ;  $p<0.0001$ ), Retrieval ( $t(68)=4.58$ ;  $p<0.0001$ ) and Catch-with-  
207 retrieval, ( $t(143)=5.08$ ;  $p<0.0001$ ; all Bonferroni-corrected for 5 comparisons; effect sizes in Table S4).  
208 In addition, the proportion of participants with significant O-scores was high (Figure 3B): 74.7% for  
209 Encoding, 69.6% for Retrieval and 76.4% for Catch-with-retrieval. On the other hand, no evidence for  
210 a behavioral oscillation was found for memory-independent task phases, as O-scores for the catch  
211 questions after memory reinstatement and the visual task did not reach significance across  
212 participants (Catch-after-retrieval:  $t(69)=1.69$ ;  $p=0.24$ ; Visual:  $t(94)=-4.10$ ;  $p=1$ ; Bonferroni-corrected  
213 for 5 comparisons; Note that the t-value captures deviation from the reference-defined threshold,  
214 hence both non-significant and negative t-values signify lack of evidence for oscillations). For these  
215 task phases the proportion of participants with significant O-scores was lower than for memory-  
216 dependent phases: 64.3% for Catch-after-retrieval and 37.9% for the Visual task. Raw O-scores (i.e.  
217 without Z-scoring) showed a similar pattern across task phases (Figure S3A).

218 To test whether memory-dependent task phases had significantly higher O-scores than memory-  
219 independent phases across participants, we fitted a linear mixed-effects model to the Z-scored O-  
220 scores. Fixed terms in this model were memory dependence and the length of the time series, which  
221 varied substantially between task phases (Figure S1C); we included the intercept per subject as  
222 random effect, to address potential dependencies due to the fact that participants of the memory task  
223 contributed 2 or 3 data points. We found strong support for an effect of memory dependency on O-  
224 score, with significantly higher Z-scored O-scores for memory-dependent than memory-independent  
225 task phases (Figure 3A; coefficient=0.28; 95% CI: 0.20-0.36;  $t(556)=6.55$ ;  $p<0.0001$ ). This was  
226 unaffected by time series length (coefficient=0.0022; 95% CI: -0.0035-0.0080;  $t(556)=0.77$ ;  $p=0.44$ ).  
227 Additional paired t-tests (Figure S3 B and C, effect sizes in Table S4) showed that O-scores for Catch-  
228 after-retrieval were lower than for Retrieval from the same participants (two-tailed paired t-test;  
229  $t(68)=2.46$ ;  $p=0.0495$ ; Encoding versus Catch-after-retrieval did not reach significance:  $t(64)=1.98$ ;  
230  $p=0.16$ ; Bonferroni-corrected for 3 comparisons), while Encoding did not differ from Retrieval ( $t(63)=-$   
231  $0.76$ ;  $p=1$ ; Bonferroni-corrected for 3 comparisons) and Catch-with-retrieval ( $t(116)=-0.94$ ;  $p=1$ ).  
232 Furthermore, O-scores were significantly lower for the Visual task than all other task phases (Figure  
233 S3; two-tailed two-sample t-tests; Encoding versus Visual:  $t(274)=7.23$ ;  $p<0.0001$ ; Retrieval versus  
234 Visual:  $t(161)=5.83$ ;  $p<0.0001$ ; Catch-with-retrieval versus Visual:  $t(236)=6.48$ ;  $p<0.0001$ ; Catch-after-  
235 retrieval versus Visual:  $t(162)=4.04$ ;  $p=0.0034$ ; Bonferroni-corrected for 4 comparisons).

236 High O-scores give a strong indication of rhythmic behavior, but for this rhythmicity to be  
237 physiologically relevant, we expect some consistency in peak frequency across participants. Indeed,  
238 for memory-dependent task phases most participants showed peak frequencies (Figure 3C) between  
239 1 and 5 Hz or harmonics of this range, with 31.6%, 41.7% and 27.5% of significant O-scores falling in  
240 the 1-5 Hz range for Encoding, Retrieval and Catch-with-retrieval task phases, respectively. These  
241 frequencies align with the low theta band identified in recordings from human hippocampus during  
242 memory tasks (Jacobs, 2014; Lega et al., 2012). On the other hand, peak frequencies were broadly  
243 distributed for Catch-after-retrieval and the Visual task. A linear mixed model fitting the frequencies  
244 of significant O-scores, with memory dependency and time series length as fixed effects, and  
245 participant ID as random effect, revealed that frequencies for memory-dependent task phases were  
246 significantly lower than for memory-independent tasks (coefficient=-5.09; 95% CI: -7.52--2.67;  
247  $t(371)=6.55$ ;  $p<0.0001$ , post-hoc tests in Table S5). There was a small effect of time series length on  
248 frequency (coefficient=-0.20; 95% CI: -0.36--0.046;  $t(371)=-2.55$ ;  $p=0.011$ ), with the higher frequencies



249 for memory-independence corresponding to shorter time series. To ensure that the difference in O-  
 250 scores and frequency between memory dependent and -independent task phases was not caused by  
 251 the lower frequency limit in the O-score procedure, which required the oscillation period to be no  
 252 wider than 1/3 of the time series length, we loosened this bound to 2 times the time series length and  
 253 recomputed the O-scores. This produced similar results (Figure S3E; Catch-after-retrieval:  $t(69)=0.91$ ;  
 254  $p=0.90$ ; Visual:  $t(94)=-6.20$ ;  $p=1$ ; Bonferroni-corrected for 5 comparisons), reaffirming that the  
 255 identified difference between memory-dependent and -independent task phases is not caused by  
 256 differences in response times.

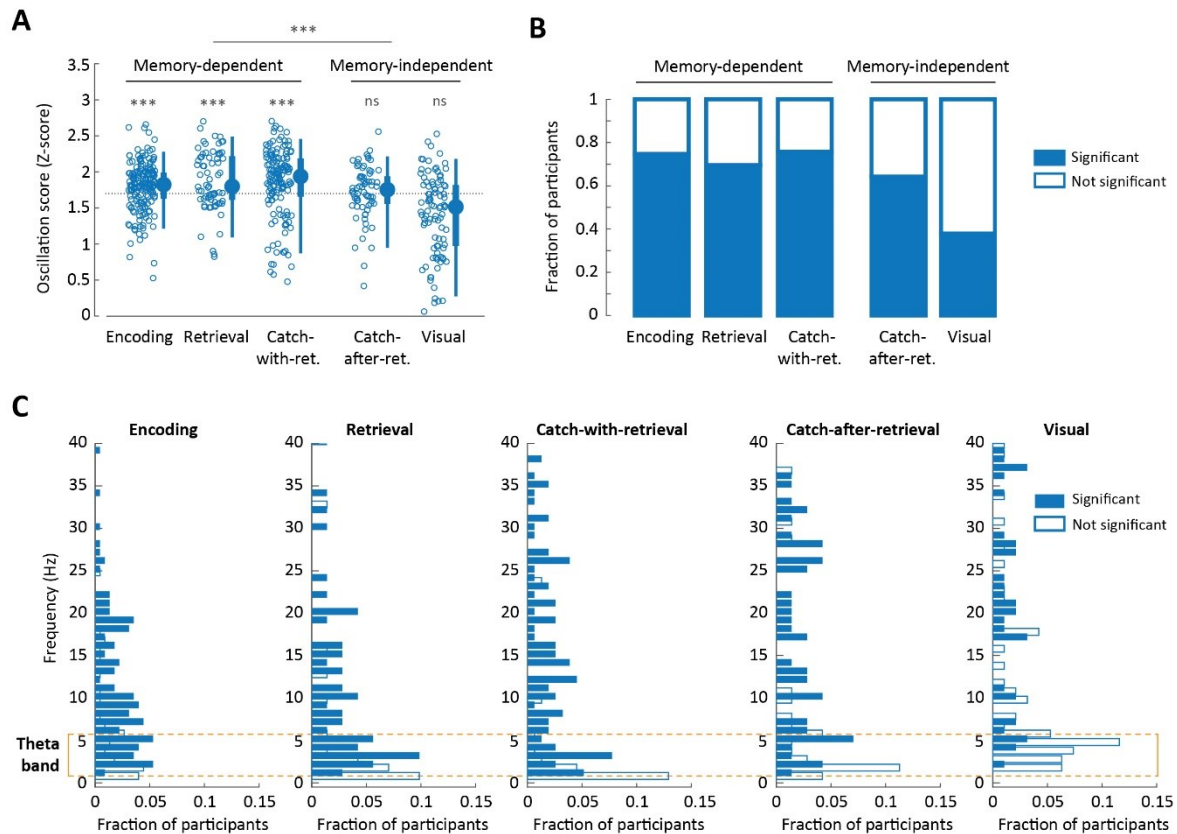

257

258 **Figure 3.** Behavioral responses oscillate at theta frequencies for memory-dependent task phases. **A:**  
 259 Scatter plot of O-scores (Z-scored) per task phase, where each circle is one participant, and box plots  
 260 representing the 5, 25, 50, 75 and 95% bounds of the O-score distribution across participants. The  
 261 dashed line gives the significance threshold for single participants ( $\alpha=0.05$ , one-tailed, Z-distribution).  
 262 The outcome of a second level t-test is given above each task phase, and the comparison between  
 263 memory-dependent and -independent task phases is given at the top (linear mixed model, see main  
 264 text and Methods). See Figure S3 for raw O-scores and additional statistics; ns: not significant; \*:   
 265  $0.05 \geq p > 0.01$ ; \*\*:  $0.001 \geq p > 0.001$ ; \*\*\*:  $p \leq 0.0001$ , Bonferroni-corrected for 5 comparisons; **B:**  
 266 Proportion of participants with significant (i.e. above the Z-threshold in A; blue bars) and non-  
 267 significant O-score (white bars); **C:** Histograms of peak frequencies per task phase, for participants  
 268 with significant (blue bars) and non-significant O-scores (white bars). The yellow outline indicates the  
 269 1-5 Hz frequency band. Participant numbers can be found in Figure 1C.

#### 270 4.4. Reaction times of incorrect trials are not locked to the behavioral oscillation

271 The O-scores reported in Figure 3 were based on correct trials only. Due to a low number of incorrect  
272 trials, it was not possible to establish whether incorrect trials show oscillatory modulation. However,  
273 we were able to test whether incorrect trials locked to the oscillation of the correct trials (correcting  
274 for fitting bias, see below) for every participant with a significant O-score. The instantaneous phase of  
275 the oscillation was determined by smoothing and filtering the correct response trace around the  
276 participant's peak frequency (for an example see Figure 2A, solid green line) and performing a Hilbert  
277 transform. We then determined the phases at which the incorrect button presses occurred (Figure 4,  
278 purple lines). Similarly, we found the phase of each correct response relative to all other correct trials,  
279 by recomputing the instantaneous phase without the trial of interest (avoiding circularity), repeating  
280 this for every correct trial (Figure 4, green). As expected, for all memory-dependent task phases,  
281 correct trials were more likely to occur around the peak of the oscillation, assessed by a V-test for non-  
282 uniformity around 0 degrees (Encoding:  $V(11398)=1861.1$ ;  $p<0.0001$ ; Retrieval:  $V(8036)=1174.3$ ;  
283  $p<0.0001$ ; Catch-with-retrieval:  $V(23815)=2847.5$ ;  $p<0.0001$ ; Bonferroni-corrected for 3 comparisons;  
284 Note that the high trial count can inflate test results). On the other hand, phase distributions were  
285 uniform for incorrect trials (Encoding:  $V(1270)=44.1$ ;  $p=0.12$ ; Retrieval:  $V(954)=11.2$ ;  $p=0.91$ ; Catch-  
286 with-retrieval:  $V(5328)=73.8$ ;  $p=0.23$ ; Bonferroni-corrected for 3 comparisons). This suggest that  
287 incorrect trials did not lock to the rhythm of the correct trials, while correct responses did lock to the  
288 oscillation from other correct trials. We did not perform this analysis for memory-independent task  
289 phases, as we found no evidence for oscillations in correct responses for these phases.

290 We next directly tested whether there was a difference in phase modulation between correct and  
291 incorrect trials, while accounting for potential biases caused by differences in trial count and  
292 procedure. We shuffled the correct and incorrect trial labels 500 times for every participant (i.e.  
293 keeping the original trial counts and response times), and computed the V-statistics of shuffled-correct  
294 and shuffled-incorrect trials as described previously. Stronger phase modulation for correct than for  
295 incorrect trials should result in a bigger difference in V-statistics for the real-correct and real-incorrect  
296 trials than for the corresponding label-shuffled trials. Indeed, phase modulation was significantly  
297 stronger for correct than for incorrect trials across participants (Encoding:  $p<0.002$ ; Retrieval:  $p<0.002$ ;  
298 Catch-with-retrieval:  $p<0.002$ ; 500 permutations).

299 For participants with a sufficient number of incorrect trials (at least 10) we also compensated for any  
300 biases by subsampling the number of correct trials to the number of incorrect trials (repeated 100  
301 times), and recomputing the phases of both the selected correct and the incorrect trials relative to the  
302 remaining correct trials (Figure 4, right panels). For these participants, the subsampling procedure also  
303 demonstrated significantly higher phase modulation for correct trials than for incorrect trials for each  
304 of the memory-dependent task phases (two-tailed paired t-test; Encoding:  $t(51)=4.07$ ;  $p=0.00049$ ;  
305 95% CI:  $<0.0001-0.14$ ; Retrieval:  $t(38)=5.41$ ;  $p<0.0001$ ; 95% CI:  $<0.0001-0.024$ ; Catch-with-retrieval:  
306  $t(101)=7.25$ ;  $p<0.0001$ ; 95% CI:  $<0.0001$ ; Bonferroni-corrected for 3 comparisons). In conclusion, all  
307 comparisons demonstrate that correct responses show substantially more phase locking than  
308 incorrect trials. Combining these findings with our previous analyses, our data suggest that correct  
309 trials show substantial behavioral oscillations, but that incorrect trials do not lock to this oscillation.

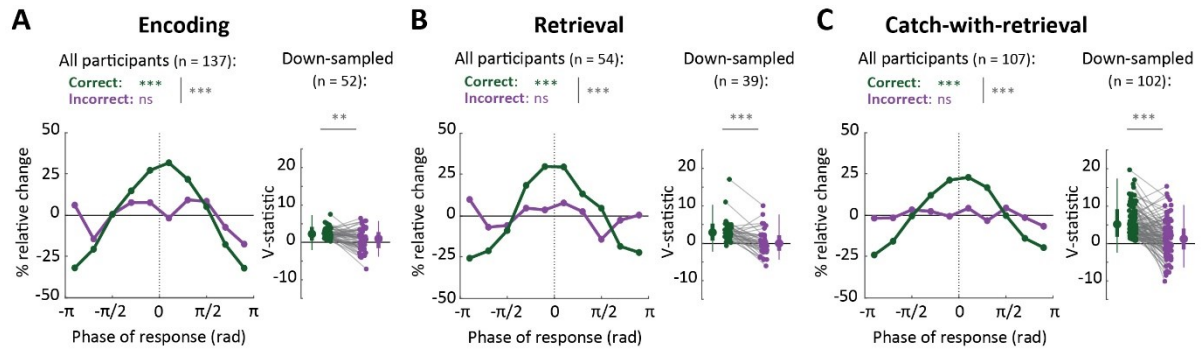

310

311 **Figure 4.** Reaction times of incorrect trials are not locked to the behavioral oscillation. Phase  
312 distributions of incorrect responses relative to all correct responses (purple) and of correct responses  
313 relative to all other correct responses (green) for the task phases with significant O-scores: Encoding  
314 (A), Retrieval (B) and Catch-with-retrieval (C). The left panels shown deviations from uniform phase  
315 distributions across all participants with significant O-scores. Statistics for correct and incorrect trials  
316 individually were obtained with a V-test for non-uniformity of the distribution around phase 0, and a  
317 permutation test was used to compare correct with incorrect distributions to a trial label-shuffled  
318 reference distribution (500 permutations, see Methods). Right panels show V-statistics for correct and  
319 incorrect trials of participants with at least 10 incorrect trials (each grey line is one participant), after  
320 down-sampling the number of correct trials to the number of incorrect trials. Shown are the mean V-  
321 statistics per participant (dots) and the distribution of V-statistics across all participants (box plots  
322 indicating the 5, 25, 50, 75 and 95% bounds of the distributions), which were compared with a two-  
323 tailed paired t-test. ns: not significant; \*: 0.01<p<0.05; \*\*: 0.0001<p<0.01; \*\*\*: p<0.0001, Bonferroni-  
324 corrected for 3 comparisons.

#### 325 4.5. Increased phase locking of hippocampal local field potentials during encoding and retrieval

326 The data reported so far indicate that across different trials, memory-relevant behavioral responses  
327 fall onto a consistent phase of a theta oscillation. The presence of such an oscillation, determined on  
328 the basis of one response per trial, implies phase consistency across trials in the neural oscillations  
329 underlying the formation and reinstatement of memory. We hypothesized that this phase consistency  
330 is induced by events in the trial, namely by the onset of the stimulus or cue, and persists until the  
331 participant successfully encodes or retrieves the memory (expected to slightly precede the button  
332 press). Given the theta peak frequency identified in the behavioral data and the nature of the task, we  
333 expected this phase consistency to occur in the hippocampus. To test these predictions, we recorded  
334 hippocampal LFPs in 10 epilepsy patients who were undergoing seizure monitoring using intracranial  
335 EEG. These patients performed the same memory task as healthy participants and their behavioral  
336 data are included in the results in Figures 1, 3 and 4. We recorded from 42 Behnke-Fried micro  
337 electrodes located in hippocampus, as well as 3 electrodes in parahippocampal cortex and amygdala  
338 (Figure 5A). Only data from the hippocampal electrodes are included here.

339 To study the phase structure in our hippocampal recordings, we wavelet transformed the LFPs and  
340 computed the Pairwise Phase Consistency (PPC; Vinck, van Wingerden, Womelsdorf, Fries, & Pennartz,  
341 2010) across trials for every frequency and time point. The PPC quantifies how similar the LFP phases  
342 are across trials. We performed this analysis separately for cue-, stimulus- and response-locked data  
343 and normalized the data against the pre-cue baseline for every electrode, before pooling across  
344 electrodes and participants. The resulting second level t-scores are shown for correct trials in Figure  
345 5B and for incorrect trials in Figure 5C.

346 In line with our predictions, we observed a significant ( $\alpha=0.05$ ) increase in PPC across trials for correct  
347 trials after stimulus onset for encoding and after cue onset for retrieval trials, assessed through a  
348 cluster-based permutation test against 100 time-shuffled datasets (Maris and Oostenveld, 2007). The  
349 clusters of significantly increased PPC (red outlines in Figure 5B) covered a range of frequencies shortly  
350 after cue/stimulus onset, but extended in time in a frequency band between 2 and 3 Hz, generally  
351 aligning with the frequencies found in the behavioral data of these patients (see Figure S4 J&K). This  
352 lower theta cluster lasted up to the response (Figure 5D), and resulted in a significant response-locked  
353 PPC cluster for retrieval (response-locked data for encoding showed increased PPC, but did not reach  
354 significance). PPC increases were also visible in the raw data (Figure S4B) and appeared as theta  
355 oscillations in event-related potentials of correct trials (Figure S4D), confirming that these effects were  
356 not caused by changes in the baseline. The increases in PPC were accompanied by increased power  
357 for retrieval trials, but not for encoding and catch questions (see Figure S4C), in line with (Vivekananda  
358 et al., 2019), suggesting that power and phase were modulated independently.

359 Interestingly, in line with the behavioral data, we found no significant increases in PPC for incorrect  
360 trials, neither for encoding nor retrieval. When we compared the PPC for correct and incorrect trials  
361 within electrodes using a cluster-based permutation test against 100 trial-shuffled reference data sets  
362 (keeping the number of shuffled-correct and shuffled-incorrect trials intact), we found that the  
363 increase in PPC after cue/stimulus onset in the 2-3 Hz frequency band was significantly stronger for  
364 correct than for incorrect trials ( $\alpha=0.05$ ; black outlines in Figures 5B and C). The intracranial data  
365 therefore support our hypothesis that memory-relevant task events induce phase resets in the  
366 hippocampal theta rhythm that result in persistent phase consistency across trials. The absence of  
367 phase consistency in LFPs from incorrect trials supports our behavioral findings that incorrect trials do  
368 not lock to the theta rhythm.



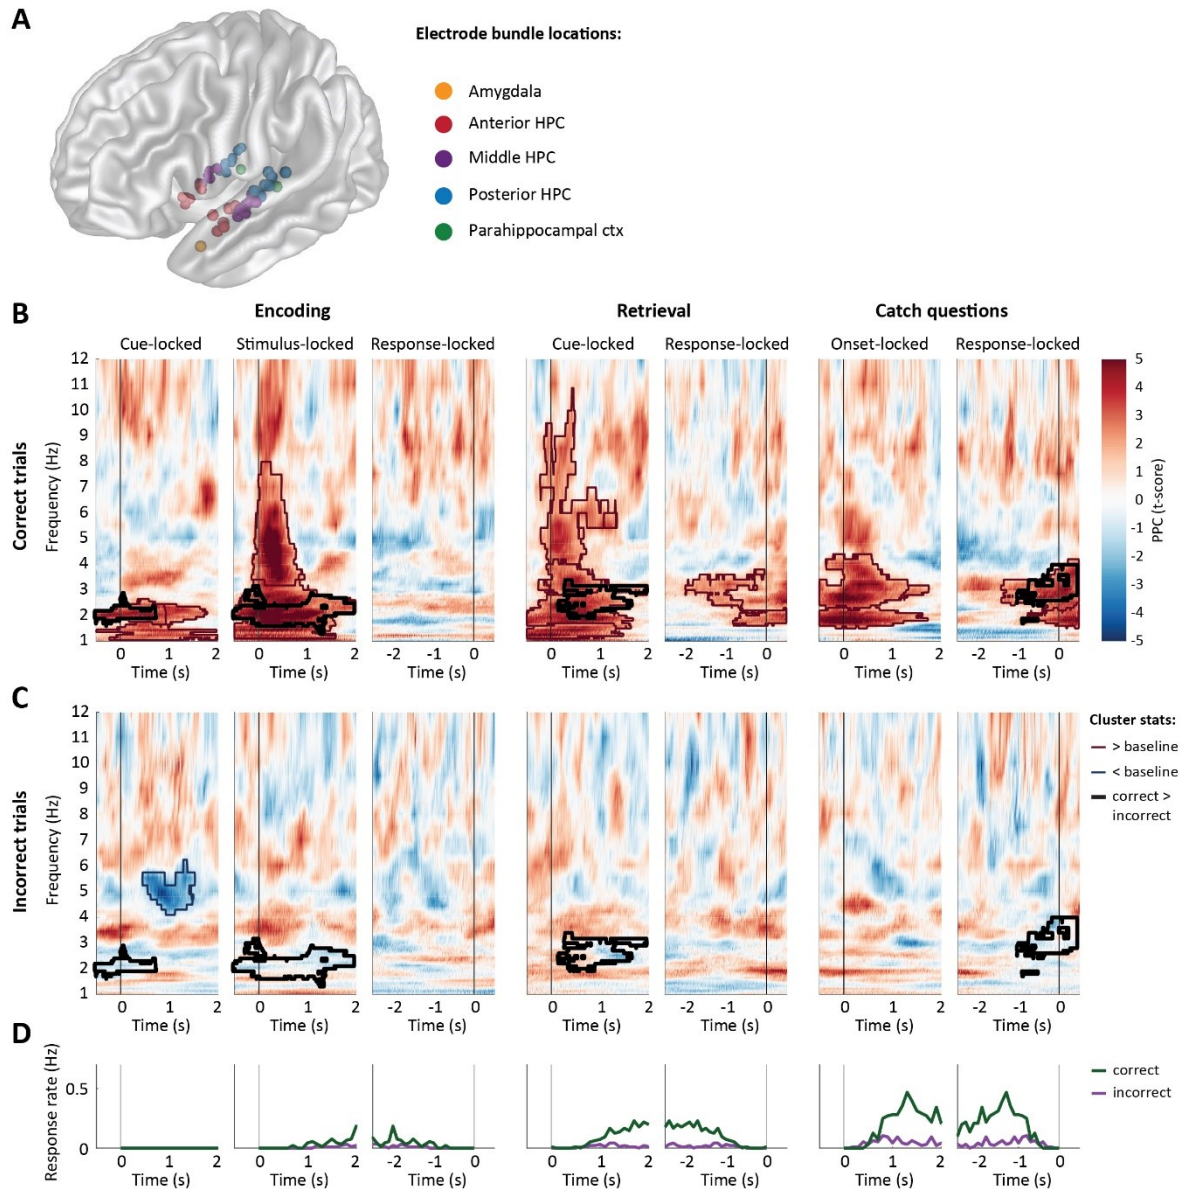

369

370 **Figure 5.** Increased phase locking of hippocampal local field potentials during encoding and retrieval.  
 371 **A:** Locations of iEEG electrode bundles (n=45), across all 10 participants, color-coded to indicate 5  
 372 regions of interest (yellow: amygdala; red: anterior hippocampus (HPC); purple: middle HPC; blue:  
 373 posterior HPC; green: parahippocampal cortex); **B & C:** Pairwise Phase Consistency (PPC, color-coded,  
 374 second level t-score) between correct (B) and incorrect (C) trials, locked to cue/stimulus onset or  
 375 response of encoding (left column), retrieval (middle) and catch trials (right). Significant changes from  
 376 baseline ( $\alpha=0.05$ , permutation test against time-shuffled trials) are indicated separately for increases  
 377 (red) and decreases (blue). Black outlines indicate significant differences between correct and  
 378 incorrect trials ( $\alpha=0.05$ , permutation test against shuffled trial labels, see also Figure S4A). For raw  
 379 PPC values see Figure S4B and for PPCs per patient see Figure S4E&F. **D:** Response rate for correct  
 380 (green) and incorrect (purple) trials, in the time windows and task phases corresponding to B & C.

381 4.6. Encoding and retrieval occur at different phases of the theta rhythm

382 The identification of phase consistency across encoding and retrieval trials allows us to determine  
383 whether their dominant phases differ, as has been suggested by (Hasselmo et al., 2002). To this end,  
384 we identified the time point and frequency at which PPC was maximal for both stimulus- and response-  
385 locked trials during encoding, and cue-locked and response-locked trials for retrieval, for each patient.  
386 We then computed the phase differences between encoding and retrieval at the corresponding  
387 frequencies and time points for every electrode. Indeed, phase differences between stimulus-locked  
388 encoding and cue-locked retrieval trials were non-uniformly distributed around  $250.7 \pm 14.1$  degrees  
389 (Rayleigh's  $Z = 30.87$ ;  $p < 0.0001$ ). Similarly, phases differed consistently between response-locked  
390 encoding and retrieval trials with an average phase difference of  $162.4 \pm 30.6$  degrees (Rayleigh's  $Z =$   
391  $7.35$ ;  $p = 0.001$ ). Both analyses provided support for a half-cycle difference between encoding and  
392 retrieval (V-test around 180 degrees; cue/stimulus-locked:  $V=33.1$ ;  $p=0.0047$ ; response-locked:  
393  $V=46.7$ ;  $p=0.0013$ ;  $n=326$ ). We tested whether the observed non-uniformity around 180 degrees  
394 phase difference was expected by comparing the V-statistics to those from 500 time-shuffled datasets.  
395 We conclude that phase opposition for the response-locked trials was unlikely to be obtained by  
396 chance ( $p=0.042$ ), while for stimulus/cue-locked data ( $p=0.13$ ), the observed V-statistic could, in part,  
397 be inflated by a phase bias, for example due to asymmetry in the theta cycles (Cole and Voytek, 2017).

398 To test whether phase opposition generalized beyond the time and frequency with the highest PPC,  
399 we computed response-locked event-related potentials for each hippocampal electrode bundle, and  
400 filtered these in the theta band (Figure 6C). We compared the phase of encoding and retrieval ERPs  
401 using V-tests in 200 ms sliding windows. After FDR-correction, 55.8% of tested windows supported  
402 phase opposition between encoding and retrieval, a pattern that is unlikely to be produced by chance.  
403 Together, these results support both theoretical and empirical findings from previous studies that  
404 encoding and retrieval processes occur at different phases of the hippocampal theta rhythm, and  
405 generalize these findings to LFP recordings from the human hippocampus.



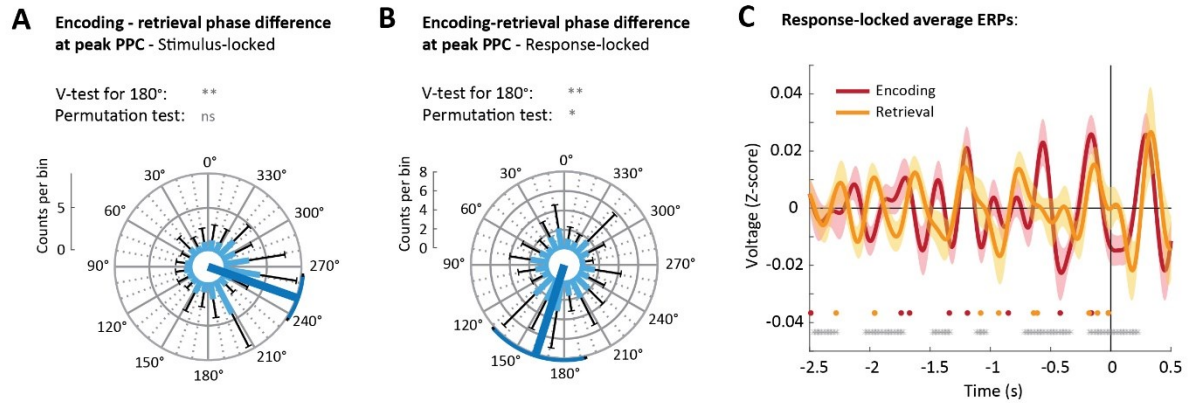

406

407

408

409

410

411

412

413

414

415

416

417

**Figure 6.** Encoding and retrieval occur at different phases of the theta rhythm. **A & B:** Circular histogram of phase differences between encoding and retrieval at the time and frequency of maximal PPC (A) following stimulus (encoding) and cue onset (retrieval), and (B) before response, across all hippocampal channels (n=326), with the mean direction in dark blue. Light blue bars give the mean and black whiskers the standard deviation across electrode bundles (n=42). V-tests assessed non-uniformity around 180 degrees, and were compared against 500 time-shuffled datasets (permutation test); **C:** Event-related potentials (ERPs) for encoding (red) and retrieval (yellow) locked to the patient's response. Solid lines give the mean, shaded areas the SEM. Grey dots indicate time windows with significant phase opposition between encoding and retrieval (V-test in 200 ms sliding windows spaced 10 ms apart; FDR-corrected with q=0.05). Red and yellow dots are the time points of peak PPC for individual patients used in Figure 6B. ns: not significant; \*: 0.01<p<0.05; \*\*: 0.0001<p<0.01.

## 418 5. Discussion

419 In this study we demonstrated that oscillations can be detected in behavioral responses from  
420 associative memory tasks. Using the Oscillation score, a method to detect oscillations in spike trains  
421 (Muresan et al., 2008), we showed that button presses that indicate the timing of encoding and  
422 retrieval of a memory were rhythmically modulated, i.e. periodically more or less likely to occur,  
423 predominantly in the 1-5 Hz frequency band. We found no evidence for behavioral oscillations for task  
424 phases that do not depend on memory. Button presses from forgotten trials did not lock to the  
425 oscillation of remembered trials, a distinction that was echoed by hippocampal LFP recordings from  
426 10 epilepsy patients: phase consistency across trials significantly increased in the slow theta range  
427 during the encoding and retrieval of correctly, but not incorrectly, memorized objects. Finally, we  
428 showed that phase consistency during encoding and retrieval peaked at opposite phases of the theta  
429 cycle, aligning with earlier work suggesting that encoding- and retrieval-related information flows are  
430 orchestrated by the phase of the hippocampal theta rhythm. Our data extend previous findings by  
431 showing that these hippocampal mechanisms influence the timing of overt human behavior.

432 In our study, we relied on button presses that explicitly marked the timing of memory formation and  
433 recall. Though the timing of these button presses is arguably subjective and relies on multiple neural  
434 processes, our results allow us to exclude several alternative explanations. Firstly, the behavioral  
435 oscillations could not be explained by rhythmicity in visual processing, as the Encoding and Visual task  
436 phases shared identical visual inputs. Secondly, a behavioral oscillation was detectable when memory  
437 reinstatement was combined with a catch question (Catch-with-retrieval), but not when the catch  
438 question was asked 3 seconds after reinstatement (Catch-after-retrieval), suggesting that 1) the  
439 observed oscillation did not result from motor processes and 2) the lack of oscillations in memory-  
440 independent phases cannot be attributed to the nature or content of the catch questions. The data  
441 also show that rhythmic clocking is not universal within memory tasks: while correct trials showed  
442 locking to a theta oscillation, incorrect trials did not, a result that was mirrored in electrophysiology.

443 Our behavioral results, combined with the hippocampal recordings, suggest a strong link between the  
444 oscillations in the button presses and the underlying memory processes in hippocampus. We did not  
445 observe significant oscillations in behavior for processes that we a priori marked as memory-  
446 independent, namely answering the catch questions after reinstatement and the visual task. We did  
447 however find increased PPC in hippocampal signals after the catch question appeared on the screen.  
448 Interestingly, the O-scores for the corresponding Catch-after-retrieval task phase, although not  
449 significant in themselves, were higher than for the visual task. A possible explanation is that retrieval-  
450 induced oscillations extend in time, or that catch questions induce a second, weaker reinstatement of  
451 the memory, leading to behavioral oscillations that are too weak to detect robustly. Alternatively, the  
452 oscillations observed for the catch questions could result from maintaining the retrieved object in  
453 working memory. Working memory has been proposed to be mediated by theta-nested gamma bursts  
454 (Lisman and Idiart, 1995; Lisman and Jensen, 2013), synchronizing a network of memory areas in  
455 frontal, temporal and parietal cortices (Bahramisharif et al., 2018; Fuentemilla et al., 2010; Jacobs et  
456 al., 2006; Raghavachari et al., 2001; Vilberg and Rugg, 2012), as well as the hippocampus (Axmacher  
457 et al., 2010; for reviews see Hsieh and Ranganath, 2014; Roux and Uhlhaas, 2014). The micro-electrode  
458 recordings presented here do not allow us to distinguish between retrieval-related theta oscillations  
459 and theta-rhythmic interactions with hippocampus during working memory maintenance. Yet our  
460 data do suggest that, at least, retrieval-related theta oscillations are associated with rhythmicity in  
461 behavior. Further work is needed to shine light on the extent to which oscillations occur during the  
462 catch question phase and to clarify their origin and function.

463 The behavioral theta oscillations for memory-dependent task phases, together with increased PPC in  
464 hippocampal LFPs across trials, suggest that events in the memory task (i.e. cue/stimulus onset) induce  
465 consistent phase resets in the hippocampal theta rhythm. Our findings suggest this phase reset is most  
466 pronounced in the slow 1-5 Hz theta band. Several human intracranial EEG studies have reported  
467 prominent slow theta oscillations during episodic memory tasks (Goyal et al., 2020; Griffiths et al.,  
468 2019; Jacobs, 2014; Lega et al., 2012), while the higher 4-8 Hz frequency band typically observed in  
469 rodents seems to be linked to movement or spatial processing (Goyal et al., 2020). LFP phase resets  
470 and phase-locking after task events have been reported for the slow theta band in memory paradigms  
471 (Haque et al., 2015; Mormann et al., 2005; Rizzuto et al., 2006; Rutishauser et al., 2010), and phase  
472 consistency directly preceding (Fell et al., 2011) and following (Fell et al., 2008) stimulus presentation  
473 has been shown to predict memory performance. Like in rodents, firing of human hippocampal  
474 neurons locked to theta oscillations shortly before and during the encoding of later-recognized but  
475 not later-forgotten images, for both slow and fast theta bands (Rutishauser et al., 2010). In line with  
476 our findings, theta phases were found to differ between encoding and retrieval task phases (Rizzuto  
477 et al., 2006), although the effects were limited to an early time window after stimulus presentation,  
478 and theta frequencies below 4 Hz were not included in this study. Our intracranial EEG results extend  
479 these previous findings by demonstrating that post-stimulus phase consistency extends in time in a  
480 narrow frequency band, providing a potential neurophysiological mechanism for the theta-clocked  
481 behavior.

482 Although our behavioral results align closely with the PPC analyses in terms of dominant frequency  
483 and subsequent memory effect, our data cannot establish a causal relationship between the  
484 hippocampal and behavioral rhythms. Optogenetic and pharmacological techniques allow for such  
485 experiments in rodents (McNaughton et al., 2006; Siegle and Wilson, 2014), while patients with  
486 hippocampal and/or medial septal lesions are a possible route to establishing causality in humans.  
487 Lesion studies can however have profound confounds, such as widespread disruptions in network  
488 dynamics beyond the hippocampal theta rhythm and substantial memory deficiency. Interestingly, a  
489 new series of studies using transcranial magnetic stimulation over lateral parietal cortex might provide  
490 a new way of establishing causality. TMS over lateral parietal cortex was shown to improve memory  
491 performance (Kim et al., 2018; Wang et al., 2014), particularly when stimulating in theta-bursts  
492 (Hermiller et al., 2019, 2020), possibly due to increased MTL activity and/or increased coherence  
493 between hippocampus and the posterior memory network. If theta-frequency TMS is able to enhance  
494 memory performance by boosting or entraining the theta rhythm, this approach could potentially  
495 establish a direct link between hippocampal and behavioral oscillations in healthy humans.

496 In recent years, phase coding has appeared as a powerful neural mechanism to optimize specificity  
497 and sensitivity on the one hand, and flexibility on the other, and has been shown in several cognitive  
498 domains. In addition to sampling of to-be-encoded and retrieved information in hippocampus,  
499 rhythmic switching of visual attention has been demonstrated at theta frequencies (Busch and  
500 VanRullen, 2010; Fiebelkorn et al., 2018; Helfrich et al., 2018; Landau and Fries, 2012). In memory  
501 tasks, potentially interfering mnemonic information has been shown to recur at different phases  
502 (Kerren et al., 2018; Kunz et al., 2019; Staudigl and Hanslmayr, 2013) or cycles (Kay et al., 2020) of the  
503 hippocampal theta rhythm. Finally, items kept in working memory are thought to be represented in  
504 gamma cycles separated in theta/alpha phase (Bahramisharif et al., 2018; Lisman and Jensen, 2013).  
505 Visual stimulation at relevant theta/alpha phases, but not opposite phases, boosted working memory  
506 performance (Ten Oever et al., 2020). Similarly, when distractors were presented during a working  
507 memory task, accuracy fluctuated with the timing of distractor onset, producing a 2.5 Hz oscillation  
508 (Wöstmann et al., 2020). Evidence is thus accumulating in both humans and other animals for a  
509 powerful role of phase coding in cognitive processes.

510 Detecting oscillations in sparse behavioral data is not a trivial task, particularly in memory paradigms  
511 that rely on one-shot learning, like the task presented here. The trial counts for these tasks are limited  
512 by the number of unique trials participants can perform, which ultimately limits the detectability of  
513 oscillations. We showed that, despite these limitations, the O-score method (Muresan et al., 2008)  
514 and our Z-scoring approach were sensitive enough to reliably detect oscillations where present, while  
515 maintaining sufficient selectivity (i.e. producing non-significant O-scores when an oscillation could not  
516 be detected reliably), as demonstrated for our simulated datasets (Supplementary Information). It is  
517 important to note, however, that a reliable analysis of oscillations in sparse data requires repeated  
518 measurements, either in the form of repeated trials (Muresan et al., 2008), or across a large number  
519 of participants, like we have done here.

520 Our results suggest that theta-rhythmicity of memory encoding and retrieval processes can not only  
521 be found in neural correlates, but also has a clear behavioral signature: the likelihood that a memory  
522 is being formed or recalled rhythmically fluctuates within a trial, at a slow theta frequency, resulting  
523 in rhythmicity of button presses relying on these processes. Our findings suggest that behavior can be  
524 a relatively straightforward, yet powerful way to assess rhythmicity of neural memory processes, an  
525 approach that has the potential to be extended to many other cognitive domains. Together, our  
526 behavioral data and hippocampal LFP recordings point to an important mechanistic role for lasting  
527 phase consistency in the hippocampal theta rhythm during memory-dependent processing.

528 **6. Acknowledgements**

529 This work was funded by starting grant ERC-2016-STG-715714 (STREAM) of the European Research  
530 Council to Maria Wimber and consolidator grant ERC-2015-647954 awarded to Simon Hanslmayr. We  
531 thank Sophie Watson, Wing Tse, Jonathan Burton-Barr, Emma Sutton, Thomas Faherty, Alexandru-  
532 Andrei Moise, Laura De Herde, Brittany Lowe, Jessica Davies and James Lloyd-Cox for their help with  
533 collecting the behavioral data and Andrew Reid, Gernot Kreiselmeyer and Rüdiger Hopfengärtner for  
534 technical support. We are grateful to all participants for donating their time, and in particular thank  
535 the patients, their families and the hospital staff, for accommodating our work.

536

537 **7. Author contributions**

538 JLD, JL and MW designed the experiments, all authors were involved in data collection. MtW  
539 performed the data analysis and MtW and MW wrote the manuscript. All authors provided feedback  
540 on the manuscript.

541

542 **8. Declaration of interests**

543 The authors declare no competing interests.

## 544 9. References

- 545 Allen, T.A., Salz, D.M., McKenzie, S., and Fortin, N.J. (2016). Nonspatial Sequence Coding in CA1  
546 Neurons. *J. Neurosci.* *36*, 1547–1563.
- 547 Amemiya, S., and Redish, A.D. (2018). Hippocampal Theta-Gamma Coupling Reflects State-  
548 Dependent Information Processing in Decision Making. *Cell Rep.* *22*, 3328–3338.
- 549 Anderson, K.L., Rajagovindan, R., Ghacibeh, G.A., Meador, K.J., and Ding, M. (2010). Theta  
550 oscillations mediate interaction between prefrontal cortex and medial temporal lobe in human  
551 memory. *Cereb. Cortex* *20*, 1604–1612.
- 552 Axmacher, N., Henseler, M.M., Jensen, O., Weinreich, I., Elger, C.E., and Fell, J. (2010). Cross-  
553 frequency coupling supports multi-item working memory in the human hippocampus. *Proc. Natl.*  
554 *Acad. Sci.* *107*, 3228–3233.
- 555 Bahramisharif, A., Jensen, O., Jacobs, J., and Lisman, J. (2018). Serial representation of items during  
556 working memory maintenance at letter-selective cortical sites. *PLoS Biol.* *16*, e2003805.
- 557 Benchenane, K., Peyrache, A., Khamassi, M., Tierney, P.L., Gioanni, Y., Battaglia, F.P., and Wiener, S.I.  
558 (2010). Coherent Theta Oscillations and Reorganization of Spike Timing in the Hippocampal-  
559 Prefrontal Network upon Learning. *Neuron* *66*, 921–936.
- 560 Benjamini, Y., and Hochberg, Y. (1995). Controlling the false discovery rate: a practical and powerful  
561 approach to multiple testing. *J. R. Stat. Soc. B* *57*, 289–300.
- 562 Berens, P. (2009). CircStat: A MATLAB Toolbox for Circular Statistics. *J. Stat. Softw.* *31*.
- 563 Busch, N.A., and VanRullen, R. (2010). Spontaneous EEG oscillations reveal periodic sampling of  
564 visual attention. *Proc. Natl. Acad. Sci. U. S. A.* *107*, 16048–16053.
- 565 Cohen, M.X. (2014). *Analyzing Neural Time Series Data - Theory and Practice* (MIT press).
- 566 Cole, S.R., and Voytek, B. (2017). Brain Oscillations and the Importance of Waveform Shape. *Trends*  
567 *Cogn. Sci.* *21*, 137–149.
- 568 Colgin, L.L. (2016). Rhythms of the hippocampal network. *Nat. Rev. Neurosci.* *17*, 239–249.
- 569 Colgin, L.L., Denninger, T., Fyhn, M., Hafting, T., Bonnevie, T., Jensen, O., Moser, M.-B., and Moser,  
570 E.I. (2009). Frequency of gamma oscillations routes flow of information in the hippocampus. *Nature*  
571 *462*, 353–357.
- 572 Crivelli-Decker, J., Hsieh, L.T., Clarke, A., and Ranganath, C. (2018). Theta oscillations promote  
573 temporal sequence learning. *Neurobiol. Learn. Mem.* *153*, 92–103.
- 574 Dragoi, G., and Buzsáki, G. (2006). Temporal Encoding of Place Sequences by Hippocampal Cell  
575 Assemblies. *Neuron* *50*, 145–157.
- 576 Duncan, K.D., and Schlichting, M.L. (2018). Hippocampal representations as a function of time,  
577 subregion, and brain state. *Neurobiol. Learn. Mem.* *153*, 40–56.
- 578 Düzel, E., Penny, W.D., and Burgess, N. (2010). Brain oscillations and memory. *Curr. Opin. Neurobiol.*  
579 *20*, 245–257.
- 580 Eichenbaum, H. (2000). A Cortical – Hippocampal System. *Nat. Rev. Neurosci.* *1*, 41–50.
- 581 Fell, J., Ludowig, E., Rosburg, T., Axmacher, N., and Elger, C.E. (2008). Phase-locking within human  
582 mediotemporal lobe predicts memory formation. *Neuroimage* *43*, 410–419.



- 583 Fell, J., Ludowig, E., Staresina, B.P., Wagner, T., Kranz, T., Elger, C.E., and Axmacher, N. (2011).  
584 Medial Temporal Theta/Alpha Power Enhancement Precedes Successful Memory Encoding: Evidence  
585 Based on Intracranial EEG. *J. Neurosci.* *31*, 5392–5397.
- 586 Fernández-Ruiz, A., Oliva, A., Nagy, G.A., Maurer, A.P., Berényi, A., and Buzsáki, G. (2017).  
587 Entorhinal-CA3 Dual-Input Control of Spike Timing in the Hippocampus by Theta-Gamma Coupling.  
588 *Neuron* *93*, 1213–1226.e5.
- 589 Fiebelkorn, I.C., Saalmann, Y.B., and Kastner, S. (2013). Rhythmic sampling within and between  
590 objects despite sustained attention at a cued location. *Curr. Biol.* *23*, 2553–2558.
- 591 Fiebelkorn, I.C., Pinsk, M.A., and Kastner, S. (2018). A Dynamic Interplay within the Frontoparietal  
592 Network Underlies Rhythmic Spatial Attention. *Neuron* *99*, 842–853.e8.
- 593 Foster, D.J., and Wilson, M.A. (2007). Hippocampal theta sequences. *Hippocampus* *17*, 1093–1099.
- 594 Fuentemilla, L., Penny, W.D., Cashdollar, N., Bunzeck, N., and Düzel, E. (2010). Theta-Coupled  
595 Periodic Replay in Working Memory. *Curr. Biol.* *20*, 606–612.
- 596 Fujisawa, S., and Buzsáki, G. (2011). A 4 Hz Oscillation Adaptively Synchronizes Prefrontal, VTA, and  
597 Hippocampal Activities. *Neuron* *72*, 153–165.
- 598 Goyal, A., Miller, J., Qasim, S., Watrous, A.J., Stein, J.M., Inman, C.S., Gross, R.E., Willie, J.T., Lega, B.,  
599 Lin, J.-J., et al. (2020). Functionally distinct high and low theta oscillations in the human  
600 hippocampus. *Nat. Commun.* *11*.
- 601 Griffiths, B.J., Parish, G., Roux, F., Michelmann, S., van der Plas, M., Kolibius, L.D., Chelvarajah, R.,  
602 Rollings, D.T., Sawlani, V., Hamer, H., et al. (2019). Directional coupling of slow and fast hippocampal  
603 gamma with neocortical alpha/beta oscillations in human episodic memory. *Proc. Natl. Acad. Sci. U.*  
604 *S. A.* *116*, 21834–21842.
- 605 Guderian, S., Schott, B.H., Richardson-Klavehn, A., and Düzel, E. (2009). Medial temporal theta state  
606 before an event predicts episodic encoding success in humans. *Proc. Natl. Acad. Sci. U. S. A.* *106*,  
607 5365–5370.
- 608 Haque, R.U., Wittig, X.J.H., Damera, S.R., Inati, X.S.K., and Zaghoul, K.A. (2015). Cortical Low-  
609 Frequency Power and Progressive Phase Synchrony Precede Successful Memory Encoding. *J.*  
610 *Neurosci.* *35*, 13577–13586.
- 611 Hasselmo, M.E., and Stern, C.E. (2014). Theta rhythm and the encoding and retrieval of space and  
612 time. *Neuroimage* *85*, 656–666.
- 613 Hasselmo, M.E., Bodelón, C., and Wyble, B.P. (2002). A proposed function for hippocampal theta  
614 rhythm: separate phases of encoding and retrieval enhance reversal of prior learning. *Neural*  
615 *Comput.* *14*, 793–817.
- 616 Helfrich, R.F., Fiebelkorn, I.C., Szczepanski, S.M., Lin, J.J., Parvizi, J., Knight, R.T., and Kastner, S.  
617 (2018). Neural Mechanisms of Sustained Attention Are Rhythmic. *Neuron* *99*, 854–865.e5.
- 618 Hermiller, M.S., VanHaerents, S., Raji, T., and Voss, J.L. (2019). Frequency-specific noninvasive  
619 modulation of memory retrieval and its relationship with hippocampal network connectivity.  
620 *Hippocampus* *29*, 595–609.
- 621 Hermiller, M.S., Chen, Y.F., Parrish, T.B., and Voss, J.L. (2020). Evidence for immediate enhancement  
622 of medial-temporal lobe memory processing by network-targeted theta-burst stimulation during  
623 concurrent fMRI. *BioRxiv* <https://doi.org/10.1101/2020.02.19.956466>.
- 624 Herweg, N.A., Apitz, T., Leicht, G., Mulert, C., Fuentemilla, L., and Bunzeck, N. (2016). Theta-Alpha

- 625 Oscillations Bind the Hippocampus, Prefrontal Cortex, and Striatum during Recollection: Evidence  
626 from Simultaneous EEG-fMRI. *J. Neurosci.* *36*, 3579–3587.
- 627 Herweg, N.A., Solomon, E.A., and Kahana, M.J. (2020). Theta Oscillations in Human Memory. *Trends*  
628 *Cogn. Sci.* *24*, 208–227.
- 629 Heusser, A.C., Poeppel, D., Ezzyat, Y., and Davachi, L. (2016). Episodic sequence memory is  
630 supported by a theta – gamma phase code. *Nat. Neurosci.* *19*, 1374–1380.
- 631 Hsieh, L.T., and Ranganath, C. (2014). Frontal midline theta oscillations during working memory  
632 maintenance and episodic encoding and retrieval. *Neuroimage* *85*, 721–729.
- 633 Hyman, J.M., Wyble, B.P., Goyal, V., Rossi, C.A., and Hasselmo, M.E. (2003). Stimulation in  
634 Hippocampal Region CA1 in Behaving Rats Yields Long-Term Potentiation when Delivered to the  
635 Peak of Theta and Long-Term Depression when Delivered to the Trough. *J. Neurosci.* *23*, 11725–  
636 11731.
- 637 Jacobs, J. (2014). Hippocampal theta oscillations are slower in humans than in rodents: Implications  
638 for models of spatial navigation and memory. *Philos. Trans. R. Soc. B Biol. Sci.* *369*.
- 639 Jacobs, J., Hwang, G., Curran, T., and Kahana, M.J. (2006). EEG oscillations and recognition memory:  
640 Theta correlates of memory retrieval and decision making. *Neuroimage* *32*, 978–987.
- 641 Jacobs, J., Kahana, M.J., Ekstrom, A.D., and Fried, I. (2007). Brain oscillations control timing of single-  
642 neuron activity in humans. *J. Neurosci.* *27*, 3839–3844.
- 643 Kahana, M.J., Sekuler, R., Caplan, J.B., Kirschen, M., and Madsen, J.R. (1999). Human theta  
644 oscillations exhibit task dependence during virtual maze navigation. *Nature* *399*, 781–784.
- 645 Kay, K., Chung, J.E., Sosa, M., Schor, J.S., Karlsson, M.P., Larkin, M.C., Liu, D.F., and Frank, L.M.  
646 (2020). Constant Sub-second Cycling between Representations of Possible Futures in the  
647 Hippocampus. *Cell* *180*, 552-567.e25.
- 648 Kerren, C., Linde-Domingo, J., Hanslmayr, S., and Wimber, M. (2018). An Optimal Oscillatory Phase  
649 for Pattern Reactivation During Memory Retrieval. *Curr. Biol.* *28*, 3383-3392.E6.
- 650 Kim, S., Nilakantan, A.S., Hermiller, M.S., Palumbo, R.T., Vanhaerents, S., and Voss, J.L. (2018).  
651 Selective and coherent activity increases due to stimulation indicate functional distinctions between  
652 episodic memory networks. *4*, eaar2768.
- 653 Kunz, L., Wang, L., Lachner-Piza, D., Zhang, H., Brandt, A., Dümpelmann, M., Reinacher, P.C., Coenen,  
654 V.A., Chen, D., Wang, W.-X., et al. (2019). Hippocampal theta phases organize the reactivation of  
655 large-scale electrophysiological representations during goal-directed navigation. *Sci. Adv.* *5*,  
656 eaav8192.
- 657 Landau, A.N., and Fries, P. (2012). Attention samples stimuli rhythmically. *Curr. Biol.* *22*, 1000–1004.
- 658 Lega, B., Burke, J., Jacobs, J., and Kahana, M.J. (2016). Slow-Theta-to-Gamma Phase-Amplitude  
659 Coupling in Human Hippocampus Supports the Formation of New Episodic Memories. *Cereb. Cortex*  
660 *26*, 268–278.
- 661 Lega, B.C., Jacobs, J., and Kahana, M. (2012). Human hippocampal theta oscillations and the  
662 formation of episodic memories. *Hippocampus* *22*, 748–761.
- 663 Lin, J.J., Rugg, M.D., Das, S., Stein, J., Rizzuto, D.S., Kahana, M.J., and Lega, B.C. (2017). Theta band  
664 power increases in the posterior hippocampus predict successful episodic memory encoding in  
665 humans. *Hippocampus* *27*, 1040–1053.

- 666 Linde-Domingo, J., Treder, M.S., Kerrén, C., and Wimber, M. (2019). Evidence that neural  
667 information flow is reversed between object perception and object reconstruction from memory.  
668 *Nat. Commun.* *10*.
- 669 Lisman, J.E., and Idiart, M.A.P. (1995). Storage of 7 +/- 2 short-term memories in oscillatory subcycles.  
670 *Science* (80-. ). *267*, 1512–1515.
- 671 Lisman, J.E., and Jensen, O. (2013). The  $\theta$ - $\gamma$  neural code. *Neuron* *77*, 1002–1016.
- 672 Lopes-dos-Santos, V., van de Ven, G.M., Morley, A., Trouche, S., Campo-Urriza, N., and Dupret, D.  
673 (2018). Parsing Hippocampal Theta Oscillations by Nested Spectral Components during Spatial  
674 Exploration and Memory-Guided Behavior. *Neuron* *94*–952.
- 675 Maris, E., and Oostenveld, R. (2007). Nonparametric statistical testing of EEG- and MEG-data. *J.*  
676 *Neurosci. Methods* *164*, 177–190.
- 677 McNaughton, N., Ruan, M., and Woodnorth, M.-A. (2006). Restoring theta-like rhythmicity in rats  
678 restores initial learning in the Morris water maze. *Hippocampus* *16*, 1102–1110.
- 679 Mormann, F., Fell, J., Axmacher, N., Weber, B., Lehnertz, K., Elger, C.E., and Fernández, G. (2005).  
680 Phase/amplitude reset and theta-gamma interaction in the human medial temporal lobe during a  
681 continuous word recognition memory task. *Hippocampus* *15*, 890–900.
- 682 Muresan, R.C., Jurjut, O.F., Moca, V. V., Singer, W., and Nikolic, D. (2008). The Oscillation Score: An  
683 Efficient Method for Estimating Oscillation Strength in Neuronal Activity. *J. Neurophysiol.* *99*, 1333–  
684 1353.
- 685 O’Keefe, J., and Recce, M.L. (1993). Phase relationship between hippocampal place units and the  
686 EEG theta rhythm. *Hippocampus* *3*, 317–330.
- 687 O’Reilly, R.C., and Norman, K.A. (2002). Hippocampal and neocortical contributions to memory:  
688 Advances in the complementary learning systems framework. *Trends Cogn. Sci.* *6*, 505–510.
- 689 Ten Oever, S., Weerd, P. De, and Sack, A.T. (2020). Phase-dependent amplification of working  
690 memory content and performance. *Nat. Commun.* *11*.
- 691 Oostenveld, R., Fries, P., Maris, E., and Schoffelen, J.M. (2011). FieldTrip: Open source software for  
692 advanced analysis of MEG, EEG, and invasive electrophysiological data. *Comput. Intell. Neurosci.*  
693 *2011*, 156869.
- 694 Pavlides, C., Greenstein, Y.J., Grudman, M., and Winson, J. (1988). Long-term potentiation in the  
695 dentate gyrus is induced preferentially on the positive phase of  $\theta$ -rhythm. *Brain Res.* *439*, 383–387.
- 696 Raghavachari, S., Kahana, M.J., Rizzuto, D.S., Caplan, J.B., Kirschen, M.P., Bourgeois, B., Madsen, J.R.,  
697 and Lisman, J.E. (2001). Gating of human theta oscillations by a working memory task. *J. Neurosci.*  
698 *21*, 3175–3183.
- 699 Rizzuto, D.S., Madsen, J.R., Bromfield, E.B., Schulze-Bonhage, A., and Kahana, M.J. (2006). Human  
700 neocortical oscillations exhibit theta phase differences between encoding and retrieval. *Neuroimage*  
701 *31*, 1352–1358.
- 702 Roux, F., and Uhlhaas, P.J. (2014). Working memory and neural oscillations: Alpha-gamma versus  
703 theta-gamma codes for distinct WM information? *Trends Cogn. Sci.* *18*, 16–25.
- 704 Rutishauser, U., Ross, I.B., Mamelak, A.N., and Schuman, E.M. (2010). Human memory strength is  
705 predicted by theta-frequency phase-locking of single neurons. *Nature* *464*, 903–907.
- 706 Sanders, H., Ji, D., Sasaki, T., Leutgeb, J.K., Wilson, M.A., and Lisman, J.E. (2019). Temporal coding

- 707 and rate remapping: Representation of non-spatial information in the hippocampus. *Hippocampus*  
708 *29*, 111–127.
- 709 Sederberg, P.B., Kahana, M.J., Howard, M.W., Donner, E.J., and Madsen, J.R. (2003). Theta and  
710 Gamma Oscillations during Encoding Predict Subsequent Recall. *J. Neurosci.* *23*, 10809–10814.
- 711 Siegle, J.H., and Wilson, M.A. (2014). Enhancement of encoding and retrieval functions through theta  
712 phase-specific manipulation of hippocampus. *Elife* *3*, 1–18.
- 713 Skaggs, W.E., McNaughton, B.L., Wilson, M.A., and Barnes, C.A. (1996). Theta phase precession in  
714 hippocampal neuronal populations and the compression of temporal sequences. *Hippocampus* *6*,  
715 149–172.
- 716 Solomon, E.A., Stein, J.M., Das, S., Gorniak, R., Sperling, M.R., Worrell, G., Inman, C.S., Tan, R.J.,  
717 Jobst, B.C., Rizzuto, D.S., et al. (2019). Dynamic Theta Networks in the Human Medial Temporal Lobe  
718 Support Episodic Memory. *Curr. Biol.* *29*, 1100-1111.e4.
- 719 Staresina, B.P., and Wimber, M. (2019). A Neural Chronometry of Memory Recall. *Trends Cogn. Sci.*  
720 *23*, 1071–1085.
- 721 Staudigl, T., and Hanslmayr, S. (2013). Theta oscillations at encoding mediate the context-dependent  
722 nature of human episodic memory. *Curr. Biol.* *23*, 1101–1106.
- 723 Thompson, S.J., Thompson, S.E.M., and Cazier, J.-B. (2019). CaStLeS (Compute and Storage for the  
724 Life Sciences): a collection of compute and storage resources for supporting research at the  
725 University of Birmingham.
- 726 VanRullen, R. (2016). Perceptual Cycles. *Trends Cogn. Sci.* *20*, 723–735.
- 727 Vilberg, K.L., and Rugg, M.D. (2012). The neural correlates of recollection: Transient versus sustained  
728 fMRI effects. *J. Neurosci.* *32*, 15679–15687.
- 729 Vinck, M., van Wingerden, M., Womelsdorf, T., Fries, P., and Pennartz, C.M. a (2010). The pairwise  
730 phase consistency: a bias-free measure of rhythmic neuronal synchronization. *Neuroimage* *51*, 112–  
731 122.
- 732 Vivekananda, U., Bush, D., Bisby, J.A., Baxendale, S., Rodionov, R., Diehl, B., Chowdhury, F.A.,  
733 McEvoy, A.W., Misericchi, A., Walker, M.C., et al. (2019). Theta power and theta-gamma coupling  
734 support spatial memory retrieval. *BioRxiv* <http://dx.doi.org/10.1101/732735>.
- 735 ter Wal, M., Linde Domingo, J., Lifanov, J., Roux, F., Kolibius, L., Gollwitzer, S., Lang, J., Hamer, H.,  
736 Rollings, D., Sawlani, V., et al. (2020). Data for: Theta rhythmicity governs the timing of behavioural  
737 and hippocampal responses in humans specifically during memory- dependent tasks.
- 738 Wang, J.X., Rogers, L.M., Gross, E.Z., Ryals, A.J., Dokucu, M.E., Brandstatt, K.L., Hermiller, M.S., and L,  
739 V.J. (2014). Targeted enhancement of cortical-hippocampal brain networks and associative memory.  
740 *Science* (80-. ). *345*, 1054–1057.
- 741 Watrous, A.J., Tandon, N., Conner, C.R., Pieters, T., and Ekstrom, A.D. (2013). Frequency-specific  
742 network connectivity increases underlie accurate spatiotemporal memory retrieval. *Nat. Neurosci.*  
743 *16*, 349–356.
- 744 Watrous, A.J., Miller, J., Qasim, S.E., Fried, I., and Jacobs, J. (2018). Phase-tuned neuronal firing  
745 encodes human contextual representations for navigational goals. *Elife* *7*, 1–16.
- 746 Wöstmann, M., Lui, T.K.Y., Frieze, K.H., Kreitewolf, J., Naujokat, M., and Obleser, J. (2020). The  
747 vulnerability of working memory to distraction is rhythmic. *Neuropsychologia* *146*, 107505.

## 748 10. Methods

### 749 10.1. Participants

750 A total of 216 healthy participants took part in behavioral, EEG and fMRI/EEG studies using the  
751 memory tasks described in the next section. A group of 10 epilepsy patients also performed a very  
752 similar memory task, more details about this group are given in section ‘iEEG recordings: patients and  
753 recording setup’. A separate group of 95 healthy participants completed the visual tasks. All healthy  
754 participants volunteered to participate in the studies and were compensated for their time through a  
755 cash payment (£6-8 per hour) or the University’s course credit system. All participants gave written  
756 informed consent before starting the study. None of the healthy participants reported a history of  
757 neurological or psychiatric disorders and all had normal or corrected-to-normal vision. Participants  
758 only took part in one version of the task, e.g. participants in the behavioral visual task could not take  
759 part in the memory EEG study. Only the behavioral data are presented here. A subset of the behavioral  
760 data (visual experiments 1 & 2, and memory experiments 5 & 6), as well as the EEG data from  
761 experiment 10 (see Table S1), were previously reported in (Linde-Domingo et al., 2019). All studies  
762 with healthy participants took place in facilities of the University of Birmingham, and the participants  
763 were recruited through the university’s research participation scheme. All studies were approved by  
764 the Science, Technology, Engineering and Mathematics Ethical Review Committee of the University of  
765 Birmingham. Demographic information for each of the participant groups is available in Table S1.

766

### 767 10.2. Task versions

768 In this manuscript we present behavioral and intracranial EEG data recorded during a series of visual  
769 and memory experiments. The experiments were originally designed to address the following  
770 question: is perceptual information about a stimulus analyzed earlier or later than semantic  
771 information, and is this processing order similar when viewing a stimulus compared with reinstating  
772 the same stimulus from memory? Data from 5 experiments and the analyses addressing the original  
773 research question have previously been reported in (Linde-Domingo et al., 2019). In the present  
774 manuscript, we analyze the button presses for perceptual and semantic questions together. We also  
775 include the behavioral data from an additional 8 follow-up experiments that took place after the  
776 collection of the initial datasets.

777 The experiments can be divided into 3 main categories (Figure 1): memory reaction time experiments;  
778 electrophysiology memory experiments; and visual reaction time experiments. All experiments used  
779 similar stimulus sets, which we describe below. We then give a general description of each category  
780 of experiments, as well as specific differences between experiments within each category. The  
781 numbers of participants per task version and their demographic information is given in Figure 1 and  
782 Table S1. The characteristics of each of the 13 task versions are summarized in Table S2.

#### 783 *Stimulus sets*

784 Across the experiments, 3 different stimulus sets were used, Standard, Shape and Size (Table S2). Each  
785 stimulus set consisted of 128 emotionally neutral, everyday objects. Each object fell into one of two  
786 perceptual categories and one of two semantic categories. Participants were instructed about the  
787 perceptual and semantic categorizations before onset of the study and were shown examples that  
788 were not included in the remainder of the study. In the standard stimulus set, used in most  
789 experiments, the semantic dimension divided the objects into animate and inanimate objects, while  
790 in the shape and size stimulus sets used in experiments 3, 4, 7 and 8, objects were categorized as



791 natural or man-made. Furthermore, 3 different perceptual dimensions were used across the tasks. In  
792 the standard stimulus set, half of the stimuli were colored photographs and the other half were black-  
793 and-white drawings. In the shape and size stimulus sets only colored photographs were used. Instead,  
794 stimuli were categorized as either long or round objects (shape stimulus set, exp. 3 and 7), or stimuli  
795 were presented as large or small pictures on the screen (size stimulus set, exp. 4 and 8).

#### 796 *Groups 1 & 2: Memory experiments*

797 In the memory experiments, participants first learned associations between cues and objects and  
798 later, after a distractor task, memories were reinstated in a cued recall phase, described in more detail  
799 below. Participants learned a total of 128 associations divided into blocks of between 4 and 8 trials.  
800 Each block consisted of an encoding phase, a distractor phase and a retrieval phase. Cues consisted of  
801 action verbs (e.g. spin, decorate, hold, ...) for all experiments except experiment 12 (details below).

802 Each encoding trial started after presentation of a fixation cross for between 500 and 1500 ms to jitter  
803 the onset of the trial. The cue then appeared in the center of the screen for 2 s. After presentation of  
804 a fixation cross for 0.5-1.5 s the stimulus (stimuli in experiment 6) appeared. Participants were asked  
805 to indicate when they made the association between cue and stimulus by pressing a button (encoding  
806 button press). The stimulus remained on the screen for 7 s. After the encoding phase, the participants  
807 performed a distractor task in which they judged whether numbers presented on the screen were odd  
808 or even. The distractor task lasted 60 s. In the retrieval phase the participants were presented with  
809 the same cues as during encoding, though in a randomly different order, and asked to recall the  
810 associated objects. They then answered either a perceptual or the semantic question about the  
811 reinstated object. The trial timed out if the participant did not answer within 10 s. Trials were  
812 separated by a fixation cross for 500-1500 ms.

813 The structure of the retrieval phases differed slightly between experiments. We therefore make a  
814 further distinction within the memory experiments, into the electrophysiology experiments (group 1;  
815 experiments 10-13) and the behavioral experiments (group 2; experiments 5-9).

816 For group 1, we aimed to separate the reinstatement processes from the formulation of the answer.  
817 To this end, participants were asked to indicate, through a button press, when they had a clear image  
818 of the associated object in mind. The trial timed out if the participant did not press the button within  
819 10 s. They then kept the image in mind for 3 seconds. Finally, the question and answer options  
820 appeared on the screen, after which the participants responded as quickly as possible. Participants  
821 had 3 s to respond. As a result, the retrieval trials of the electrophysiology experiments produced two  
822 button presses: a retrieval button press and a catch-after-retrieval button press. These button presses  
823 are analyzed separately. Only the reinstatement button press is considered memory-dependent,  
824 because the catch question appears at a time point when the object has supposedly already been fully  
825 retrieved.

826 For group 2, the answer options were shown on the screen for 3 s before the retrieval cue appeared.  
827 The catch-with-retrieval button presses obtained for the memory reaction time experiments can  
828 therefore be assumed to represent the time point when sufficient information has been retrieved  
829 about the object to answer the catch question.

830 The number of times we asked participants to retrieve associations was varied between behavioral  
831 experiments in group 2. In experiments 5, 7 and 8, every object was probed twice, and participants  
832 answered both the perceptual and semantic question for each object in random order. In experiment  
833 9, every object was reinstated 6 times in the retrieval phase of the block, and twice during a delayed  
834 retest 2 days later, with the delayed test not included due to poor performance (average performance



835 49.6%, only 16 out of 52 participants performed above chance). In experiment 6, participants learned  
836 associations of triplets instead of pairs, consisting of cue, object and scene image. During the retrieval  
837 phase of this experiment, each object was probed only once, and in addition to the perceptual and  
838 semantic questions participants were asked a question about the background image (indoor or  
839 outdoor?), such that each question was answered on 1/3 of the trials.

840 The group 1 memory task was used for EEG recordings (experiment 10), combined EEG/fMRI  
841 recordings (experiment 11) and intracranial EEG recordings in epilepsy patients (experiments 12 and  
842 13, also see section 10.3). Several small adjustments were made to the task to accommodate  
843 electrophysiology. First, to minimize the duration of the testing sessions, the duration of the distractor  
844 phase was reduced to 20 s in the EEG/fMRI experiment, while in the EEG and iEEG task versions, every  
845 object was reinstated only once. To compensate for the corresponding drop in the number of catch  
846 questions, participants answered both perceptual and semantic catch questions on every trial, one  
847 after the other, in random order. The doubling of the number of catch questions per trial was  
848 introduced after the first 3 EEG participants and 3 iEEG patients were recorded. In addition, the first 3  
849 iEEG patients learned pairs of background scenes and objects, instead of verb-object pairs, with the  
850 background scenes functioning as cues during the retrieval phase (experiment 12). These patients only  
851 learned a total of 64 pairs. The reaction time data from these 3 patients showed no difference to that  
852 of the other 7 patients (see Figure S1) and no qualitative differences were found in the PPC analysis  
853 (PPC per patient is shown in Figure S4). During encoding trials, the background and object appeared  
854 on the screen at the same time. As a result, the encoding trials of these 3 participants do not have a  
855 separate cue period.

856 We made two further modifications to the task for the iEEG recordings in all epilepsy patients. First,  
857 the task was made fully self-paced, such that length of verb presentation and the period needed to  
858 associate cue and object were determined by the patient on each trial. The patients pressed a button  
859 when they were ready to move on. Second, to avoid loss of attention/motivation and/or to  
860 accommodate medical procedures, visitors and rest periods, the task was divided into two or three  
861 sessions, recorded at different times or on different days. Data from different sessions were pooled  
862 and analyzed together. Details of the electrophysiological recordings included in this manuscript can  
863 be found in the section 'iEEG recordings: patients and recording setup'.

#### 864 *Group 3: Visual reaction time experiments*

865 In the visual experiments, participants were shown a series of stimuli on the screen, and were asked  
866 either a perceptual or a semantic question about each stimulus. The stimuli and questions used in the  
867 visual experiments were identical to those in the memory experiments. To get accurate estimates of  
868 the reaction times, the answer options were shown for 3 s prior to stimulus presentation. Stimuli were  
869 presented in the center of the screen. Each trial was preceded by a fixation cross for a random duration  
870 of between 500 and 1500 ms, so the onset of the trial could not be predicted. Like in memory group  
871 2, participants were instructed to answer as fast as possible.

872 In experiments 1, 3 and 4, all 128 stimuli were shown twice, once followed by a perceptual and once  
873 by a semantic question (in random order), so both questions were answered for every object. In  
874 experiment 2, in which the object images were shown with a background, all stimuli were presented  
875 only once, followed by one of three questions: perceptual, semantic or contextual, with the later  
876 referring to the background (indoor or outdoor). All button presses were included here. We refer to  
877 (Linde-Domingo et al., 2019) for analyses comparing the different catch questions.

878

### 879 10.3. Assessment of performance and exclusion of participants

880 Prior to reaction time analyses, the performance of each of the participants was analyzed based on  
881 their accuracy in answering the catch questions. Answers to catch question were considered incorrect  
882 when subjects chose the wrong answer, when they indicated they had forgotten the answer (for  
883 memory tasks) or when they did not answer on time (for healthy participants only). The data of a  
884 participant were only included in the analysis of a task phase if the following two requirements were  
885 met: 1) catch question accuracy across trials exceeding chance level and 2) a minimum of 10 correct  
886 button presses per participant in the task phase of interest. The first criterium was assessed using a  
887 one-sided binomial test against a guessing rate of 50% with  $\alpha = 0.05$ . The second criterium had to be  
888 set as some participants repeatedly failed to provide encoding (reinstatement) button presses before  
889 trial time-out, leaving too few trials to run further analyses for the Encoding (Retrieval) phase, despite  
890 sufficient performance when answering the catch questions. The inclusion criteria were set *a priori*.  
891 The number of participants included in each of the task phases is shown in Figure 1 and the number  
892 of excluded participants can be found in Figure S1A.

893 Of the participants who performed the memory tasks, 28 participants answered two catch questions  
894 per retrieval trial, while the remaining 198 answered one. To bring the analyses of the 28 participants  
895 with 2 catch questions per trial in line with the data from the other 198 participants, we considered a  
896 2-catch trial to be correctly reinstated if one or both catch questions were answered correctly (on  
897 average, across 28 subjects: one catch question correct: 12.5% of trials; two catch questions correct:  
898 76.0% of trials, see Figure S1D).

899

### 900 10.4. RT analysis: O-score and statistics per participant

901 To assess the presence and strength of oscillations in behavioral responses we used the Oscillation  
902 score (O-score, Figure 2B), a method that was developed to analyze oscillations in spike trains  
903 (Muresan et al., 2008). Like spikes, the button presses we study here are discreet, all or nothing events,  
904 and can be summarized as trains of button presses across trials. The O-score method identifies the  
905 dominant frequency in those trains, and produces a normalized measure of the strength of the  
906 oscillation that can be compared across conditions.

907 We added an additional processing step before computing the O-score, to compensate for the fact  
908 that behavioral responses, unlike spikes, have no baseline rate (e.g. they cannot occur before  
909 cue/stimulus onset). Extremely early and late responses therefore have to be considered outliers. We  
910 removed these outliers prior to O-score computation by removing the first and last 5% of the button  
911 press trace of each participant, i.e. maintaining the middle 90% of the button presses. Figure S2B  
912 shows that reducing the fraction of button presses included in the analyses affected the ability to  
913 identify oscillations, but did not affect the differences found between the task phases.

914 The button presses from correctly answered trials that remained after outlier removal entered the O-  
915 score computation. We made two modifications to the procedure described in (Muresan et al., 2008)  
916 to match the characteristics of our dataset. The O-score procedure and our modifications are  
917 described below.

918 We defined a wide frequency range of interest of between  $f_{\min}^{\text{init}} = 0.5$  and  $f_{\max}^{\text{init}} = 40$  Hz for the O-  
919 score analysis. Given the wide variety in the number of responses and response times, we checked for  
920 every participant and task phase whether these pre-set frequency bounds were valid. Following  
921 (Muresan et al., 2008), we increased the lower bound to  $1/c_{\min}$  of the width of the response

922 distribution (in seconds) of the participant, with  $c_{\min} = 3$ , such that at least 3 cycles of the lowest  
923 detectable frequency were present in the data. We reduced the upper bound to the average response  
924 rate (button presses per second), if the participant did not have enough button presses to resolve the  
925 upper frequency limit. The O-score was then computed through the following series of steps:

926 Step 1: As described in (Muresan et al., 2008), we computed the auto-correlation histogram (ACH) of  
927 the button presses with a time bin size of 1 ms ( $f_s = 1000$  Hz).

928 Step 2: The ACH was smoothed with a Gaussian kernel with a standard deviation  $\sigma_{\text{fast}}$  of 2 ms. As  
929 estimated in (Muresan et al., 2008), this smoothing kernel attenuated frequencies up to 67 Hz by less  
930 than 3 dB, allowing us to detect frequencies in the entire frequency range of interest.

931 Step 3: We identified the width of the peak in the ACH using the method described in (Muresan et al.,  
932 2008). However, to avoid the introduction of low frequencies by replacing the peak, we opted to only  
933 use positive lags beyond the detected ACH peak for further steps, as the peak-replacement approach  
934 would not allow us to detect frequencies toward the lower bound of our frequency range of interest.  
935 To identify the peak, we smoothed the ACH with a Gaussian kernel with  $\sigma_{\text{slow}}$  of 8 ms, resulting in the  
936 smoothed ACH trace  $A_{\text{slow}}(l)$ , with  $l$  the lag. We then identified the left boundary lag of the central  
937 peak  $l_{\text{left}}$  by:

$$938 \quad l_{\text{left}} = l \left| \Delta A_{\text{slow}}(l) \frac{2 l_{\text{max}} + 1}{A_{\text{slow}}(0)} \leq \tan \left( \frac{10 \pi}{180} \right) \right|,$$

939 Where  $l_{\text{max}}$  is the highest lag included in the ACH and  $A_{\text{slow}}(0)$  is the value of the peak of the ACH (i.e.  
940 at lag 0).

941 Step 4: The remaining part of the ACH was subsequently truncated/zero padded to size  $w$ , where  $w =$   
942  $2 \left\lceil \max \left( \log_2 \left( 2 c_{\min} \frac{f_s}{f_{\min}} \right), \log_2 \left( \frac{f_s}{2} \right) \right) \right\rceil + 1$ . We then applied a Hanning taper and the Fourier transform was  
943 computed.

944 Step 5: We identified the frequency with the highest power in the participant-adjusted frequency  
945 bounds, as well as the average magnitude of the spectrum between 0 and  $f_s/2$  Hz. The O-score was  
946 then computed as:  $O = \frac{M_{\text{peak}}}{M_{\text{avg}}}$ .

947 In their paper, Muresan and colleagues propose a method to estimate the confidence interval of the  
948 O-score, allowing for a statistical assessment at the single cell level. However, this approach requires  
949 multiple repeated recordings, which are not available for the data presented here, nor do the datasets  
950 contain enough data points to create independent folds. Instead, we opted to generate a participant-  
951 specific reference distribution of O-scores for the identified frequency, to which we could compare  
952 the observed O-score. To this end, we randomly generated 500 time series for each participant  
953 matching the trial count and overall response density function of the participant's original button  
954 presses. First, a gamma probability function  $r_{\text{gamma}}(t)$  was fitted to the participant's response  
955 distribution and scaled to the number of responses of the participant. We then generated 500 Poisson  
956 time series, with the probability of a response in a time step  $\Delta t = 0.5$  ms, given by:

$$957 \quad P_{\text{resp}}(t \rightarrow t + \Delta t) = r_{\text{gamma}}(t) \Delta t.$$

958 If a gamma distribution could not be fitted (as assessed through a  $\chi^2$  goodness-of-fit test with  $\alpha =$   
959 0.05), the participant's button presses were instead randomly redistributed in time, with the new time  
960 per button press uniformly drawn from a window defined by the participant's peak frequency and  
961 centered around the original response time.

962 O-scores were then computed for each of the resulting reference traces, but instead of finding the  
963 peak, the power at the peak frequency of the observed O-score was used. This approach controls for  
964 any frequency bias that could arise due to the length of the time series and/or the number of  
965 datapoints included in the analysis. To compare the observed O-score to the reference O-scores, we  
966 first log-transform all O-score values. This log-transformation was needed as the O-score is a bounded  
967 measure (it cannot take values below 0) and the O-score distribution is therefore right-skewed when  
968 O-score values are low, leading to an underestimation of the standard deviation of the reference  
969 distribution. The log-transformed reference O-scores were then used to perform a one-tailed Z-test  
970 for the observed O-score at  $\alpha = 0.05$ , establishing the significance of the oscillation at the single  
971 participant level. For a validation that 500 reference O-scores was sufficient to produce a stable  
972 outcome for the Z-scoring, we refer to Figure S2A. Second level t-scores were subsequently computed  
973 based on the Z-scored O-scores for each task phase and tested with  $\alpha = 0.01$  (one-tailed, Bonferroni-  
974 corrected for 5 task phases). These Z-scored oscillation scores can be assumed to represent the  
975 strength of the behavioral oscillation, and are the basis of many of our statistical comparisons.

976 To test whether the O-scores of memory-dependent task phases, i.e. Encoding, Retrieval and Catch-  
977 with-retrieval, and memory-independent task phases, i.e. Catch-after-retrieval and Visual, against  
978 each other, we fitted a linear mixed model to the Z-scored O-scores, with memory-dependence and  
979 the length of the time series used for O-score computation as fixed effects, and an intercept per  
980 participant as random effect. We included the length of the time series, computed as the difference  
981 (in seconds) between the last and the first RT used in the O-score analysis, because there was a  
982 substantial difference in response times between the task phases, with overall similar patterns as the  
983 O-scores (see Figure S1). We included participants as random effects to compensate for the difference  
984 in the number of datapoints contributed by memory task participants (3 datapoints from group 1, 2  
985 datapoints from group 2) compared to visual task participants (1 datapoint from group 3), and to  
986 account for dependencies in the data. We fitted an identical linear mixed model to the peak  
987 frequencies corresponding to significant O-scores. The linear mixed models were fitted using the  
988 fitlme function from the Statistics and Machine Learning Toolbox for MATLAB (The Mathworks Inc.).

989 The performance of the modified O-score method and Z-scoring procedure were tested in a simulated  
990 dataset where the amplitude and frequency of the oscillation in the simulated button presses was  
991 varied. Methods and results of these simulations are given in the Supplementary Information.

992

#### 993 10.5. RT analysis: Phase of response

994 For the task phases with significant second level O-scores, i.e. Encoding, Retrieval and Catch-with-  
995 retrieval, we analyzed the phases at which individual button presses occurred in the behavioral  
996 oscillation identified by the O-score analysis. We performed this analysis for both correctly and  
997 incorrectly remembered trials. As this analysis relied on the frequency identified by the O-score  
998 analysis, only participants with significant O-scores were included.

999 To identify the phases of the button presses, we first established a continuous reference trace that  
1000 captured the behavioral oscillation. This was achieved by convolving the button presses with a  
1001 Gaussian kernel, with  $\sigma_{\text{freq}} = f_{\text{peak}}/8$ . The resulting continuous trace was then band-pass filtered with  
1002 2<sup>nd</sup> order Butterworth filter with a 1 Hz wide pass band centered on the participant's peak frequency  
1003 identified by the O-score. The filtered trace was then Hilbert transformed and the instantaneous phase  
1004 was computed, resulting in a phase of 0 rad for the peak of the behavioral oscillation. Finally, for each

1005 button press, the corresponding phase of the reference trace was determined and stored for further  
1006 analyses.

1007 We used two complementary approaches to compare the phase-locking of correct versus incorrect  
1008 trials: across participants, allowing us to include correct and incorrect trials from all participants with  
1009 significant O-scores, even when the number of incorrect button presses was low; and within  
1010 participants, comparing the phase distributions of correct and incorrect trials for participants with 10  
1011 or more incorrect trials. These approaches are described in more detail below.

1012 With the across-participant analysis we aimed to address the following questions: 1) are correct and  
1013 incorrect trials phase-locked to the behavioral oscillation found for the correct trials and 2) are correct  
1014 trials locked to this oscillation more strongly than incorrect trials? For these analyses, to find the  
1015 phases of incorrect trials, we compared the timing of the incorrect button presses to the phase trace  
1016 determined on the correct trials only. To determine the phases of the correct trials, to avoid circularity,  
1017 we instead used a leave-one-out approach; for each correct button press, a phase trace was  
1018 established based on all other correct trials. We then performed a V-test (implementation: CircStat  
1019 toolbox; Berens, 2009) to assess non-uniformity of the phase distributions around the peak of the  
1020 behavioral oscillation (i.e. around phase 0 rad), providing an answer to the first question. To address  
1021 the second question, i.e. whether correct phase distributions were modulated more strongly than  
1022 incorrect phase distributions, we had to compensate for the trial count differences as well as the  
1023 methodological differences in determining the phase distributions for correct and incorrect trials. To  
1024 this end, we defined the permutation test statistic  $V_{\text{diff}} = V_{\text{correct}} - V_{\text{incorrect}}$ , with  $V$  being the test  
1025 statistic from the V-test for non-uniformity around phase 0. For each participant with a significant O-  
1026 score, we then randomly shuffled the labels of the correct and incorrect trials, and computed the  $V_{\text{diff}}$   
1027 statistic across participants for the label-shuffled trials in the same way as described for the observed  
1028 labels. We repeated this shuffling procedure 100 times and counted the number of times  $V_{\text{diff}}^{\text{observed}}$   
1029 was smaller than  $V_{\text{diff}}^{\text{shuffled}}$ . This procedure hence resulted in a p-value that estimated the likelihood  
1030 that the observed difference in phase modulation between correct and incorrect trials was produced  
1031 by chance.

1032 For participants with sufficient (10 or more) incorrect trials, we performed an additional analysis to  
1033 compare the phase modulation of correct and incorrect trials. For these participants, the correct trials  
1034 were randomly subsampled to match the number of incorrect trials. The phases of the incorrect trials  
1035 and the subsampled correct trials were then determined based on the phase trace of the remaining  
1036 correct trials and V-tests were performed for both subsampled correct and incorrect phase  
1037 distributions. The V-statistics for correct trials were then compared to those for incorrect trials using  
1038 paired t-tests. The subsampling procedure was repeated 100 times.

1039

#### 1040 10.6. iEEG recordings: patients and recording setup

1041 We recorded intracranial EEG from 10 epilepsy patients while they were admitted to hospital for  
1042 assessment for focus resection surgery; 7 patients were recorded in the Queen Elizabeth Hospital  
1043 Birmingham (Birmingham, UK) and 3 patients in the Universitätsklinikum Erlangen (Erlangen,  
1044 Germany). For an 11<sup>th</sup> patient, task recording was aborted due to poor performance. All patients were  
1045 recruited by the clinical team, were informed about the study and gave written informed consent  
1046 before their stay in hospital. Ethical approval was granted by the National Health Service Health  
1047 Research Authority (15/WM/2019), the Research Governance & Ethics Committee from the University



1048 of Birmingham, and the Ethik-Kommission der Friedrich-Alexander Universität Erlangen-Nürnberg  
1049 (142\_12 B).

1050 The patients were implanted with between 2 and 8 Behnke-Fried electrodes with microwire bundles  
1051 (AdTech Medical Instrument Corporation, USA) in the medial temporal lobe (see Figure 1 for electrode  
1052 placement and Table S6 for electrode numbers per patient), as well as a number of depth electrodes  
1053 in other brain areas. Only data from the microwires are presented here, since these were targeted at  
1054 hippocampal grey matter. Implantation schemes were determined by the clinical team and were  
1055 based solely on clinical requirements. Each microwire bundle contained 8 high-impedance wires and  
1056 1 low impedance wire, which was used as reference in most patients (see Table S6 for patient-specific  
1057 references). Data were recorded using an ATLAS recording setup (Neuralynx Inc, USA.) consisting of  
1058 CHET-10-A pre-amplifiers and a Digital Lynx NX amplifier. Data were filtered using analog filters with  
1059 cut-off frequencies at 0.1 Hz and 9000 Hz (40 Hz for patient 01) and sampled at 32,000 Hz in  
1060 Birmingham and 32,768 Hz in Erlangen. All data were stored on the CaStLeS storage facility of the  
1061 University of Birmingham (Thompson et al., 2019).

1062 For each patient both pre- and post-surgical T1-weighted MRI images were acquired. The pre- and  
1063 post-surgical scans were co-registered and normalized to MNI space using SPM12. The locations of  
1064 the tip of the macro-electrodes were determined through visual inspection using MRICron and  
1065 electrodes were assigned one of the following anatomical labels: amygdala, anterior, middle or  
1066 posterior hippocampus, or parahippocampal gyrus. The locations and labels were visualized using  
1067 ModelGUI and are shown in Figure 5A.

1068 The patients performed the memory task described in section 'Task versions' on a laptop computer  
1069 (Toshiba Tecra W50), while seated in their hospital bed or on a chair next to their bed. The three  
1070 patients who were recorded in Erlangen, Germany, performed the task in German. Patients completed  
1071 between 64 and 128 full trials, divided over between 1 and 3 recording sessions (see Table S7). Of the  
1072 10 patients, 3 patients performed a version of the task that used scene images as cue (see above),  
1073 while the other patients were presented with verbs as cues. For the image cue task version, the cue  
1074 was shown at the same time as the object, hence the encoding data of 3 patients had no separate cue  
1075 phase.

1076

1077 10.7. iEEG analysis: LFP data preprocessing

1078 Raw microwire data were loaded into MATLAB using the MatlabImportExport scripts (version 6.0.0)  
1079 provided by Neuralynx Inc.. The data were subsequently zero-phase filtered with a 3<sup>rd</sup> order FIR high-  
1080 pass filter with a cut-off frequency of 0.5 Hz and a 6<sup>th</sup> order FIR low-pass filter with a cut-off frequency  
1081 of 200 Hz using FieldTrip (Oostenveld et al., 2011). A Notch filter with a stopband of 0.5 Hz wide at -3  
1082 dB was used to remove 50 Hz line noise and its harmonics. The data were down-sampled to 1000 Hz  
1083 and divided into encoding and retrieval trials.

1084 All data were visually inspected and channels/time points that contained electrical artefacts or  
1085 epileptic activity were removed. Trials that had more than 20% of time points marked as artefactual  
1086 were rejected in their entirety. In an additional pre-processing step, the data of patient 03 were re-  
1087 referenced against the mean of the channels in each microwire bundle. This was done to bring the  
1088 data from this patient, whose data were originally recorded against ground, more in line with the  
1089 referencing schemes of the other patients, which were recorded against a local reference wire (see  
1090 Table S6 for reference information per patient).



1091 10.8. iEEG analysis: Wavelet transform, Pairwise Phase Consistency and Cluster statistics

1092 The pre-processed microwire recordings were wavelet transformed using a complex Morlet wavelet  
1093 with a bandwidth parameter of 4. We used the cwt implementation from the Wavelet Toolbox for  
1094 MATLAB (The Mathworks Inc., USA) to compute the wavelet transform. The wavelet was scaled to  
1095 cover a frequency range between 1 and 12 Hz in 43 pseudo-logarithmic steps and convolved with the  
1096 data in time steps of 10 ms.

1097 To obtain the power plots in Figure S4C, we extracted the absolute value of the wavelet coefficients  
1098 and assessed power changes per frequency against a -2 to -0.5 s pre-cue baseline using a two-sided t-  
1099 test for every time point. We averaged the resulting t-maps across the wires within each bundle, as  
1100 they shared a common low impedance reference. The bundle averages were then used to compute a  
1101 second level t-score across the bundles of all participants. The p-values resulting from the second level  
1102 analysis were entered into a Benjamini-Hochberg false discovery rate (FDR) correction procedure with  
1103  $q = 0.05$  to correct for multiple comparisons and the t-score map was masked at  $\alpha = 0.05$ .

1104 The phases obtained for every frequency and time point in the trial using the complex wavelet  
1105 transform were used to compute the pairwise phase consistency (PPC, Vinck et al., 2010) across trials  
1106 for each time- and frequency pixel and for each microwire. The PPC was calculated for correct and  
1107 incorrect trials separately. The PPC values were then non-parametrically tested relative to their pre-  
1108 cue baseline, defined as the period from 2 s to 0.5 s prior to cue onset, using a Mann-Whitney U-test.  
1109 We opted for a non-parametric test due to the strong left-skew of the PPC data. As for the power  
1110 analyses, the resulting approximated Z-values were averaged across the microwires in a bundle, and  
1111 the averages were used to compute a second level t-score across all bundles from all patients.

1112 We then detected time-frequency clusters of significant PPC through the following steps. First, the t-  
1113 scored PPC values were thresholded at  $\alpha = 0.05$  with  $df = N_{\text{bundles}} - 1$ , resulting in a binary image  
1114 with 0 = non-significant and 1 = significant. This binary image was entered into an 8-connected  
1115 component labelling algorithm to identify clusters of significant PPC values.

1116 As we used a fixed threshold to identify the clusters, it is possible for clusters to be made up of two or  
1117 more merged peaks. This merging of peaks artificially inflates the cluster's size. To avoid this, we tested  
1118 whether each cluster contained more than one peak, and if so, split the cluster. To this end, for every  
1119 cluster, we iteratively increased the significance threshold towards 90% of the highest value in the  
1120 cluster, in 5% increments, and reran the cluster detection method described in the previous  
1121 paragraph. We required any resulting subclusters to be at least 5% of the size of the original cluster,  
1122 to overcome noise in the data. If no subclusters were found, the threshold was increased further. On  
1123 the other hand, if all identified subclusters were smaller than 5% of the original cluster, we concluded  
1124 that the cluster could not be split. If subclusters of sufficient size were detected, these were stored.  
1125 For all pixels that were part of the original cluster, but were not a member of any of the new  
1126 subclusters, we computed the weighted Euclidian distance to all subclusters and assigned them to the  
1127 closest subcluster. For each resulting (sub)cluster we then computed a cluster statistic defined as the  
1128 sum of all t-scores from all pixels in the cluster.

1129 We took a non-parametric approach to assess the statistics at the cluster level. To this end, we went  
1130 back to the wavelet transforms and, at a random time point in each trial, divided the trial in two parts.  
1131 We then concatenated the first part of the trial to the end of the second part. This procedure,  
1132 suggested in (Cohen, 2014), left all characteristics of the dataset intact, with the exception of the  
1133 temporal structure of the phase. We computed the PPC across these time-shuffled trials, Z-scored  
1134 against baseline, computed the second level t-score, identified clusters of significant t-scores and

1135 computed the cluster scores as described in the previous paragraph. We repeated this procedure 100  
1136 times and we stored the highest cluster score for each repetition, resulting in a reference distribution  
1137 of maximum cluster scores. We then non-parametrically compared the cluster scores from the intact  
1138 data to the reference distribution, with  $\alpha = 0.05$ . We performed the time-shuffle analysis  
1139 independently for positive and negative changes in PPC and for correct and incorrect trials separately.

1140 Finally, we also compared the PPCs from correct and incorrect trials to each other directly. We used a  
1141 similar approach as described above, with two important differences: 1) the second level analysis was  
1142 now performed on the pair-wise difference between correct and incorrect PPCs from the same bundle  
1143 and 2) we shuffled correct and incorrect trials (as opposed to time points) to obtain the reference  
1144 distribution.

1145

## 1146 10.9. Phase differences and Event-Related Potentials

1147 We used two different approaches to assess whether phases between encoding and retrieval trials  
1148 differed. First, we tested whether encoding and retrieval phases differed at the moment of peak PPC,  
1149 i.e. where the effect of phase resets was optimal and trials were most phase aligned. To this end, we  
1150 detected the highest PPC value for every participant and stored the average phase for every electrode  
1151 at the corresponding time and frequency. We then computed the phase difference per electrode by  
1152 subtracting the retrieval phases from the encoding phases. This procedure was performed on both  
1153 the cue- (for retrieval) or stimulus- (for encoding) locked data and for the response-locked data. We  
1154 subsequently performed V-tests for non-uniformity around 180 degrees to assess whether the phases  
1155 of encoding and retrieval were opposite at peak PPC. We compared the V-statistics to V-statistics  
1156 computed using the same approach in 500 time-shuffled datasets (see previous section).

1157 For the second approach we computed Event-Related Potentials (ERPs) to test for phase opposition  
1158 in time windows leading up to the response. To obtain the ERPs, we first Z-scored the raw data per  
1159 electrode by subtracting the mean and dividing by the standard deviation of all trials and time points.  
1160 We then tested whether all electrodes had the same sign. This step was essential because recordings  
1161 from different layers of the hippocampus can have opposing polarities. In micro-wire recordings there  
1162 is no control over the placement of the electrode, nor is it possible to determine this placement based  
1163 on scans, hence potential sign flips have to be detected in the data, before averaging data of different  
1164 electrodes. We detected the sign by identifying the highest deflection in the trial-average of every  
1165 electrode in the 1 second time interval after cue onset during encoding. If this deflection was negative,  
1166 the data from the electrode was flipped. Note that the time interval we used for sign testing was not  
1167 included in the ERP analysis in Figure 6. We then averaged the trials of all wires within a micro-wire  
1168 bundle, separating correct and incorrect trials. The data resulting from this step are represented in  
1169 Figure S4D. We then filtered the averaged data in the theta-frequency band (1-5 Hz; data in Figure 6C)  
1170 and identified the instantaneous phase using the Hilbert transform. We subtracted the instantaneous  
1171 phases from the retrieval trials of the phases from the encoding trials for each bundle yielding the  
1172 instantaneous phase difference. The phase differences were collected in windows of 200 ms (i.e. 1  
1173 cycle at the 5 Hz upper bound of the theta band) spaced 10 ms apart and we tested whether the phase  
1174 differences in each window were non-uniformly distributed around 180 degrees using a V-test. We  
1175 used a Benjamini-Hochberg False Discovery Rate correction procedure (Benjamini and Hochberg,  
1176 1995) with  $q = 0.05$  to account for repeated tests across the time windows.

1177

## 1178 10.10. Software and code

1179 The task presentation and all data analyses were performed using MATLAB 2015a-2018a (The  
1180 Mathworks), using functions from the Wavelet Toolbox and the Statistics and Machine Learning  
1181 Toolbox. The following third-party functions and software tools were used:

- 1182 - Psychophysics Toolbox Version 3 (Releases between January 2017 and April 2019):  
1183 <https://github.com/Psychtoolbox-3/Psychtoolbox-3>
- 1184 - CircStats toolbox 2012a (Berens, 2009): <https://github.com/circstat/circstat-matlab>
- 1185 - FieldTrip v20190615 (Oostenveld et al., 2011): <https://github.com/fieldtrip/fieldtrip>;
- 1186 - NeuralynxImportExport v6.0.0: [https://neuralynx.com/software/category/matlab-netcom-](https://neuralynx.com/software/category/matlab-netcom-utilities)  
1187 [utilities](https://neuralynx.com/software/category/matlab-netcom-utilities)
- 1188 - SPM12: <https://www.fil.ion.ucl.ac.uk/spm/>
- 1189 - MRICron: <https://people.cas.sc.edu/rorden/mricron/index.html>
- 1190 - ModelGUI: <http://www.modelgui.org>

1191

#### 1192 10.11. Data and code availability

1193 Custom functions and scripts used to produce the results presented here are available via  
1194 <https://github.com/marijeterwal/behavioral-oscillations>. All behavioral data underlying the results in  
1195 this manuscript have been made available and from the iEEG dataset, the PPC-values for correct and  
1196 incorrect trials, including the time- and trial-shuffled PPCs have been made public (ter Wal et al., 2020,  
1197 <https://doi.org/10.6084/m9.figshare.c.5192567>). Other data will be made available upon reasonable  
1198 request, but note that we cannot provide raw iEEG data and patient-specific electrode locations due  
1199 to privacy and consent restrictions.

## Supplementary Information to:

### **Theta rhythmicity governs the timing of behavioral and hippocampal responses in humans specifically during memory-dependent tasks**

Marije ter Wal<sup>1,6,\*</sup>, Juan Linde Domingo<sup>1,2</sup>, Julia Lifanov<sup>1</sup>, Frederic Roux<sup>1</sup>, Luca Kolibius<sup>1</sup>, Stephanie Gollwitzer<sup>3</sup>, Johannes Lang<sup>3</sup>, Hajo Hamer<sup>3</sup>, David Rollings<sup>4</sup>, Vijay Sawlani<sup>4</sup>, Ramesh Chelvarajah<sup>4</sup>, Bernhard Staresina<sup>1</sup>, Simon Hanslmayr<sup>1,5</sup>, Maria Wimber<sup>1,5,\*</sup>

<sup>1</sup> School of Psychology & Centre for Human Brain Health, University of Birmingham, Edgbaston, B15 2TT, Birmingham, UK

<sup>2</sup> Max Planck Institute for Human Development, 14195, Berlin, Germany

<sup>3</sup> Universitätsklinikum Erlangen, 91054, Erlangen, Germany

<sup>4</sup> Queen Elizabeth Hospital Birmingham, Edgbaston, B15 2GW, Birmingham, UK

<sup>5</sup> Institute of Neuroscience & Psychology, University of Glasgow, G12 8QB, Glasgow, UK

<sup>6</sup> Lead contact

\*Correspondence: [m.j.terwal@bham.ac.uk](mailto:m.j.terwal@bham.ac.uk); [maria.wimber@glasgow.ac.uk](mailto:maria.wimber@glasgow.ac.uk)

## **Content**

|                                                                        |             |
|------------------------------------------------------------------------|-------------|
| Supplementary Tables S1 – S7                                           | pg ii - v   |
| Supplementary Figures S1 – S4                                          | pg vi - xi  |
| Supplementary Methods: Simulated data for validation of O-score method | pg xii      |
| Supplementary Results: Validation of O-score method                    | pg xiii-xiv |

## 1. Supplementary Tables S1 – S7

**Table S1.** Demographic information for the 13 experiments included in this study. From left to right, the columns provide the following information: category = the general group the experiment fell under (refer to the main Methods section for more details); task version = number of the experiment used throughout the manuscript and stimulus set; # participant (excl.) = the number of participants that completed the experiment, with the number in brackets indicating the number of participants that were excluded due to poor performance for the catch questions; Avg. age  $\pm$  SD = the mean age and standard deviation of all participants in years; sex = # number of males (m) and females (f) taking part in the study.

| Category                                  | Task version & Stimulus set       | # part. (excl.) | Avg. age $\pm$ SD    | Sex         |
|-------------------------------------------|-----------------------------------|-----------------|----------------------|-------------|
| Visual RT experiments (group 3)           | 1. Standard                       | 23 (0 excl)     | 19.35 $\pm$ 1.11 yrs | 19 f - 4 m  |
|                                           | 2. Standard - with background     | 24 (0 excl)     | 19.00 $\pm$ 0.88 yrs | 20 f - 4 m  |
|                                           | 3. Shape                          | 24 (0 excl)     | 18.71 $\pm$ 0.62 yrs | 23 f - 1 m  |
|                                           | 4. Size                           | 24 (0 excl)     | 19.04 $\pm$ 0.91 yrs | 21 f - 3 m  |
| Memory RT experiments (group 2)           | 5. Standard                       | 26 (1 excl)     | 19.00 $\pm$ 0.80 yrs | 23 f - 3 m  |
|                                           | 6. Standard with background       | 24 (4 excl)     | 19.50 $\pm$ 0.93 yrs | 22 f - 2 m  |
|                                           | 7. Shape                          | 25 (0 excl)     | 20.64 $\pm$ 2.36 yrs | 17 f - 8 m  |
|                                           | 8. Size                           | 23 (1 excl)     | 19.13 $\pm$ 0.90 yrs | 23 f - 1 m  |
|                                           | 9. Standard - multiple retrievals | 57 (5 excl)     | 18.90 $\pm$ 0.74 yrs | 47 f - 10 m |
| Memory electrophys. experiments (group 1) | 10. Standard - EEG                | 24 (0 excl)     | 21.91 $\pm$ 4.68 yrs | 20 f - 4 m  |
|                                           | 11. Standard - EEG/fMRI           | 37 (1 excl)     | 23.31 $\pm$ 3.95 yrs | 26 f - 11 m |
|                                           | 12. Standard - iEEG image cue     | 3 (0 excl)      | 34.4 $\pm$ 9.11 yrs  | 5 f - 5 m   |
|                                           | 13. Standard - iEEG verb cue      | 7 (0 excl)      |                      |             |

**Table S2.** Task details for the different experiments. From left to right, the columns provide the following information: task # = number of the experiment used throughout the manuscript; type = experiment type ('beh.' for behavioral only); task phases = the task phases this experiment contributed to; Stimulus set = the stimulus set that was used; # trials = the number of unique objects (for visual tasks) or cue-object pairs (for memory tasks) the participants were presented with. For some of the visual tasks, the objects were shown twice, indicated by a 'x 2'; # retrieval repetitions (for memory tasks only; NA means not applicable) = the number of times each learned object had to be reinstated during the retrieval phases of the experiment; Catch questions: catch questions used for the experiment, with perc. = perceptual, sem. = semantic and cont. = contextual; # catch Q per trial = the number of catch questions that were asked after reinstatement.

| Task # | Type        | Task phases                               | Stimulus set            | # trials | # ret. reps.                                      | Catch questions:                                                                              | # catch Q per trial  |
|--------|-------------|-------------------------------------------|-------------------------|----------|---------------------------------------------------|-----------------------------------------------------------------------------------------------|----------------------|
| 1      | Beh.        | Visual                                    | Standard                | 128 x 2  | NA                                                | <i>Perc.:</i> drawing/photo<br><i>Sem.:</i> animate/inanimate                                 | 1                    |
| 2      | Beh.        | Visual                                    | Standard background     | 128      | NA                                                | <i>Perc.:</i> drawing/photo<br><i>Sem.:</i> animate/inanimate<br><i>Cont.:</i> indoor/outdoor | 1                    |
| 3      | Beh.        | Visual                                    | Shape                   | 128 x 2  | NA                                                | <i>Perc.:</i> round/elongated<br><i>Sem.:</i> natural/manmade                                 | 1                    |
| 4      | Beh.        | Visual                                    | Size                    | 128 x 2  | NA                                                | <i>Perc.:</i> big/small<br><i>Sem.:</i> natural/manmade                                       | 1                    |
| 5      | Beh.        | Encoding<br>Catch-with-ret.               | Standard                | 128      | 2                                                 | <i>Perc.:</i> drawing/photo<br><i>Sem.:</i> animate/inanimate                                 | 1                    |
| 6      | Beh.        | Encoding<br>Catch-with-ret.               | Standard background     | 128      | 1                                                 | <i>Perc.:</i> drawing/photo<br><i>Sem.:</i> animate/inanimate<br><i>Cont.:</i> indoor/outdoor | 1                    |
| 7      | Beh.        | Encoding<br>Catch-with-ret.               | Shape                   | 128      | 2                                                 | <i>Perc.:</i> round/elongated<br><i>Sem.:</i> natural/manmade                                 | 1                    |
| 8      | Beh.        | Encoding<br>Catch-with-ret.               | Size                    | 128      | 2                                                 | <i>Perc.:</i> big/small<br><i>Sem.:</i> natural/manmade                                       | 1                    |
| 9      | Beh.        | Encoding<br>Catch-with-ret.               | Standard                | 128      | 6<br>(7 <sup>th</sup> & 8 <sup>th</sup> excluded) | <i>Perc.:</i> drawing/photo<br><i>Sem.:</i> animate/inanimate                                 | 1                    |
| 10     | EEG         | Encoding<br>Retrieval<br>Catch-after-ret. | Standard                | 128      | 1                                                 | <i>Perc.:</i> drawing/photo<br><i>Sem.:</i> animate/inanimate                                 | 2<br>(1 for 3 part.) |
| 11     | EEG<br>fMRI | Encoding<br>Retrieval<br>Catch-after-ret. | Standard                | 128      | 2                                                 | <i>Perc.:</i> drawing/photo<br><i>Sem.:</i> animate/inanimate                                 | 1                    |
| 12     | iEEG        | Encoding<br>Retrieval<br>Catch-after-ret. | Standard -<br>image cue | 64       | 1                                                 | <i>Perc.:</i> drawing/photo<br><i>Sem.:</i> animate/inanimate                                 | 1                    |
| 13     | iEEG        | Encoding<br>Retrieval<br>Catch-after-ret  | Standard -<br>verb cue  | 128      | 1                                                 | <i>Perc.:</i> drawing/photo<br><i>Sem.:</i> animate/inanimate                                 | 2                    |



**Table S3.** Reaction time descriptors for correct trials per task phase, across all included participants.

| Measure                          | Task phase |           |                      |                       |        |
|----------------------------------|------------|-----------|----------------------|-----------------------|--------|
|                                  | Encoding   | Retrieval | Catch-with-retrieval | Catch-after-retrieval | Visual |
| Mean RT (s)                      | 3.99       | 2.20      | 2.24                 | 1.42                  | 0.89   |
| SD of RT (s)                     | 2.57       | 2.22      | 1.26                 | 1.25                  | 0.45   |
| 5% bound (s)                     | 1.29       | 0.68      | 0.97                 | 0.53                  | 0.44   |
| 95% bound (s)                    | 6.81       | 5.15      | 4.79                 | 3.22                  | 1.67   |
| Mean # responses per participant | 66.27      | 150.68    | 217.66               | 158.17                | 215.20 |
| SD # responses per participant   | 33.93      | 54.28     | 99.2                 | 57.88                 | 54.1   |

**Table S4.** Effect sizes of the O-scores per task phase (i.e., against the permuted baseline), and between task phases (i.e., comparing against each other).

|                       | d'    | Cohen's d |           |                 |                  |        |
|-----------------------|-------|-----------|-----------|-----------------|------------------|--------|
|                       |       | Encoding  | Retrieval | Catch-with-ret. | Catch-after-ret. | Visual |
| Encoding              | 0.46  |           | -0.21     | -0.12           | 0.23             | 0.92   |
| Retrieval             | 0.56  |           |           | 0.064           | 0.39             | 0.92   |
| Catch-with-retrieval  | 0.43  |           |           |                 | 0.28             | 0.86   |
| Catch-after-retrieval | 0.20  |           |           |                 |                  | 0.64   |
| Visual                | -0.42 |           |           |                 |                  |        |

**Table S5.** Post-hoc tests for peak frequency from the Oscillation score procedure.

| Group(s)                     | Comparison                         | Test (all two-tailed) | Bonferroni-correction | Statistic | p-value  |
|------------------------------|------------------------------------|-----------------------|-----------------------|-----------|----------|
| Group 1                      | Encoding vs Retrieval              | Wilcoxon signed rank  | 3                     | 1.081     | 0.839    |
|                              | Encoding vs Catch-after-retrieval  | Wilcoxon signed rank  | 3                     | -1.197    | 0.694    |
|                              | Retrieval vs Catch-after-retrieval | Wilcoxon signed rank  | 3                     | -1.776    | 0.227    |
| Group 2                      | Encoding vs Catch-with-retrieval   | Wilcoxon signed rank  | NA                    | -3.201    | 0.0014   |
| Group 1 & Group 2 vs Group 3 | Encoding vs Visual                 | Wilcoxon rank-sum     | 4                     | -4.529    | < 0.0001 |
|                              | Retrieval vs Visual                | Wilcoxon rank-sum     | 4                     | -3.664    | 0.000988 |
|                              | Catch-with-retrieval vs Visual     | Wilcoxon rank-sum     | 4                     | -2.593    | 0.038    |
|                              | Catch-after-retrieval vs Visual    | Wilcoxon rank-sum     | 4                     | -1.340    | 0.721    |

**Table S6.** Implantation information per patient: the number of Behnke-Fried microwire bundles that were implanted in hippocampus (in brackets the number of bundles that were located outside of hippocampus) and the number of functional hippocampal wires we recorded from. In the right column, the referencing and re-referencing scheme is indicated.

| Patient ID    | # microwire bundles              | # functional hippocampal wires | References                           |
|---------------|----------------------------------|--------------------------------|--------------------------------------|
| 01            | 4 (+ 2 removed due to artifacts) | 29                             | Low impedance wires                  |
| 02            | 6                                | 48                             | High impedance wires                 |
| 03            | 6                                | 42                             | Ground, re-referenced to bundle mean |
| 04            | 4                                | 32                             | Low impedance wires                  |
| 05            | 5 (1)                            | 40                             | Low impedance wires                  |
| 06            | 6 (2)                            | 48                             | Low impedance wires                  |
| 07            | 5                                | 39                             | Low impedance wires                  |
| 08            | 2                                | 16                             | Low impedance wires                  |
| 09            | 2                                | 16                             | Low impedance wires                  |
| 10            | 2                                | 16                             | Low impedance wires                  |
| <b>Total:</b> | <b>42 (3)</b>                    | <b>326</b>                     |                                      |

**Table S7.** Task and recording information per patient, as well as the number of trials that were included in the analyses.

| Patient ID | Task version  | # sessions | # correct encoding tr | # incorrect encoding tr | # correct retrieval tr | # incorrect retrieval tr |
|------------|---------------|------------|-----------------------|-------------------------|------------------------|--------------------------|
| 01         | 12. Image cue | 1          | 48                    | 14                      | 50                     | 14                       |
| 02         | 12. Image cue | 1          | 55                    | 9                       | 55                     | 9                        |
| 03         | 12. Image cue | 1          | 61                    | 3                       | 61                     | 2                        |
| 04         | 13. Verb cue  | 2          | 99                    | 27                      | 101                    | 20                       |
| 05         | 13. Verb cue  | 2          | 33                    | 9                       | 66                     | 14                       |
| 06         | 13. Verb cue  | 3          | 90                    | 31                      | 92                     | 31                       |
| 07         | 13. Verb cue  | 3          | 107                   | 18                      | 108                    | 15                       |
| 08         | 13. Verb cue  | 2          | 116                   | 12                      | 116                    | 12                       |
| 09         | 13. Verb cue  | 1          | 42                    | 21                      | 43                     | 20                       |
| 10         | 13. Verb cue  | 2          | 103                   | 25                      | 103                    | 25                       |

## 2. Supplementary Figures S1 – S4

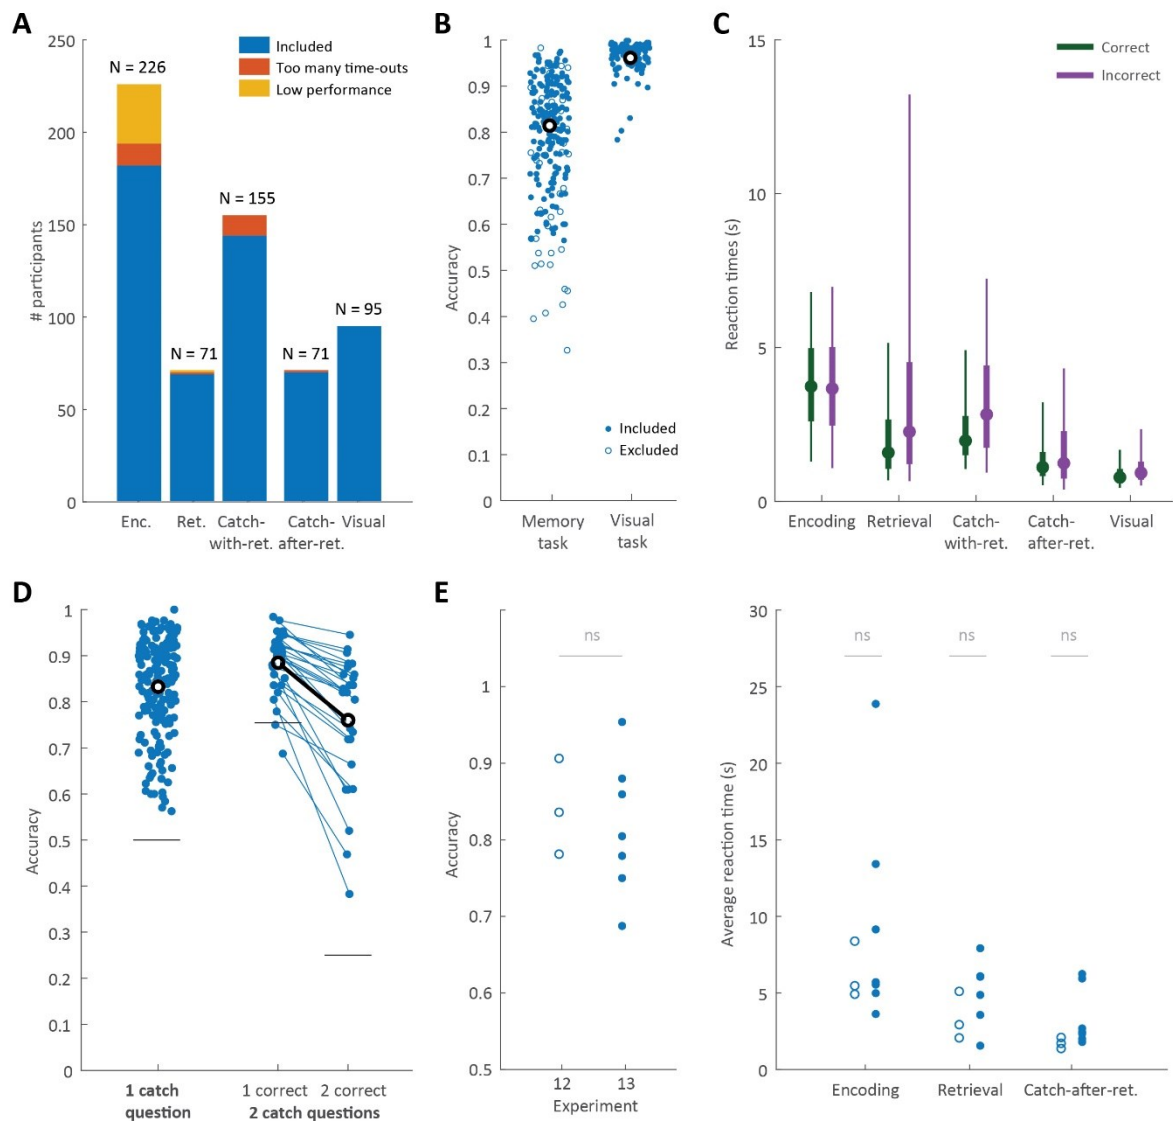

**Figure S1.** Descriptors of behavioral data. **A:** Number of included participants (blue) and the number of participants excluded for bad performance (yellow) or insufficient number of data points (orange) per task phase. Numbers above each bar indicate the total number of participants that were recorded. Enc. is Encoding; Ret. is Retrieval; Catch-with. is Catch-with-retrieval; **B:** Accuracy per participant on the memory and visual tasks. Included participants are indicated by filled circles, excluded participants by open circles; **C:** Box plots showing the reaction time distributions, across all included participants, for correct (green) and incorrect trials (purple), per task phase. Box plots indicate the 5, 25, 50 (circles), 75 and 95% boundaries; **D:** Fraction of correct trials for memory tasks with 1 catch question asked after retrieval (left), or two questions asked (middle and right). For participants answering two questions (connected dots), we show the fraction of trials with at least 1 question answered correctly (middle) and the fraction with two questions correct (right). Horizontal lines represent guessing level; **E:** Task performance (left) and reaction times (right) of the iEEG patients who participated in experiments 12 (open circles) and 13 (filled circles). Statistical comparison using a two-tailed t-test ( $\alpha = 0.05$ ); ns is not significant.

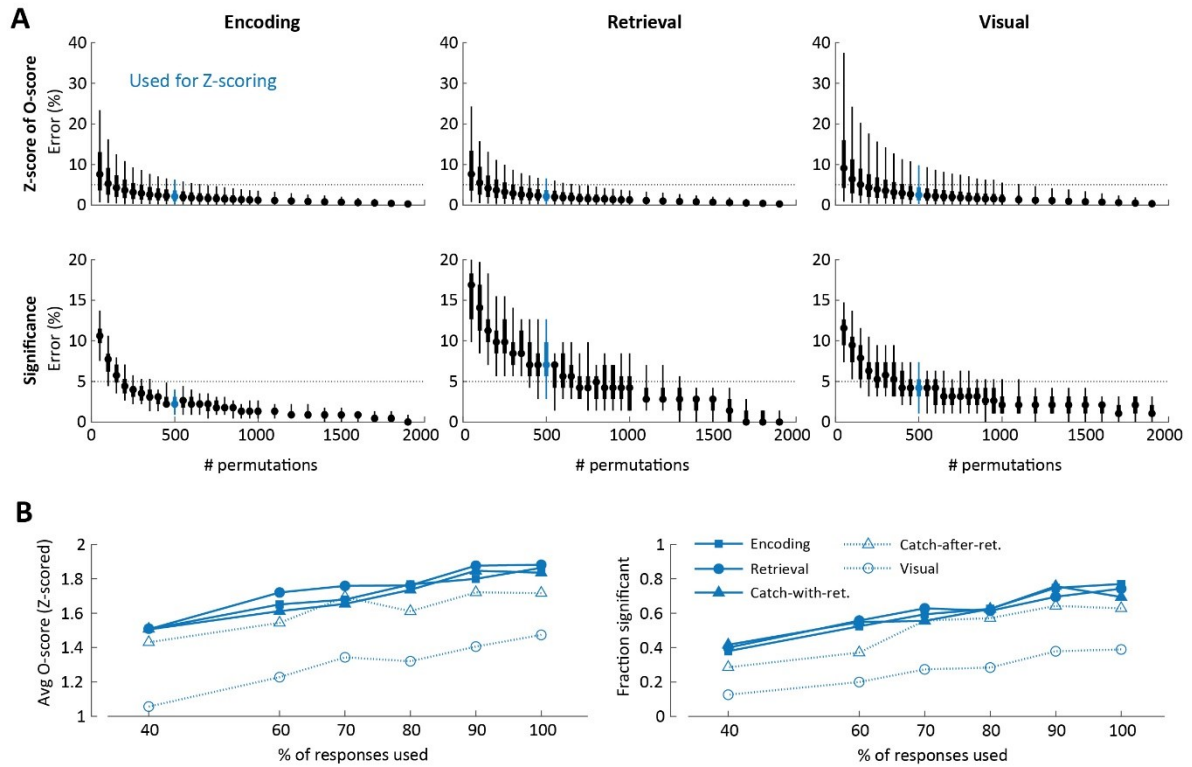

**Figure S2.** Validation of parameters of the behavioral analyses. **A:** To test the Z-scoring method for the O-score, we computed reference distributions with 2000 permutations for each participant for Encoding (left), Retrieval (middle) and Visual (right) task phases, and down-sampled the reference distribution to between 50 and 1900 permutations (x-axes), each repeated 50 times. We report the deviation (%) relative to the Z-scores obtained for 2000 permutations (top row) and the percentage difference in the number of participants marked as significant (bottom row). The number of permutations used throughout the manuscript (500 permutations), is indicated in blue. Horizontal dashed lines indicate a 5% error; **B:** Average Z-scored O-score (left) and fraction of participants with a significant O-score (right) as a function of the percentage of responses used to analyze the O-score. Reducing the percentage of responses included in the O-score analysis reduced the O-score and the fraction of significant participants, but this reduction affected all 5 task phases in a similar way. Task phases are indicated by line/symbol combinations: solid line with filled squares: Encoding; solid line with filled circles: Retrieval; solid line with filled triangle: Catch-with-retrieval; dashed line with open triangle: Catch-after-retrieval and dashed line with open circle: Visual.

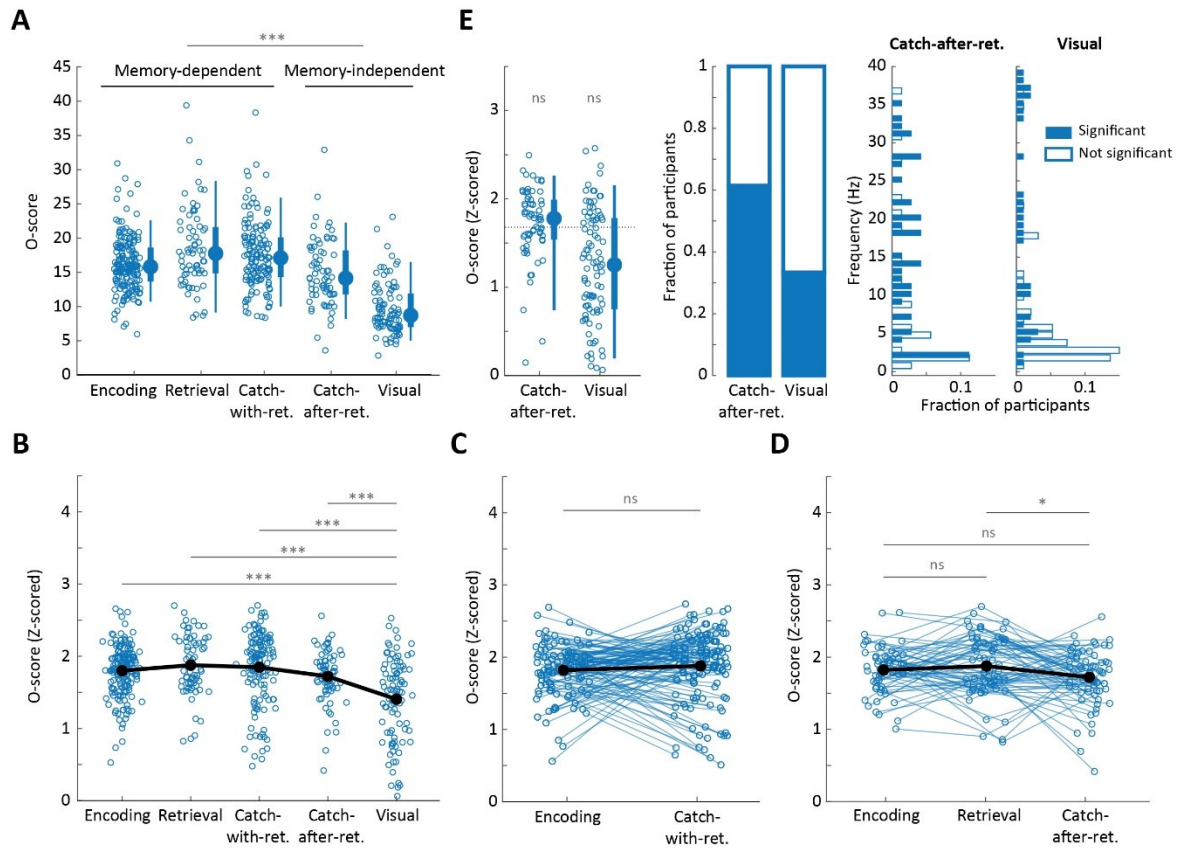

**Figure S3.** Additional O-score analyses. **A:** Raw O-scores per task phase. Each dot is one participant. Box plots (right) summarize the data across participants and show the 5, 25, 50 (circles), 75 and 95% boundaries; **B:** t-tests between Visual task phase and all other task phases (two-tailed,  $\alpha = 0.05$ , Bonferroni corrected for 4 comparisons). Black line shows the mean O-scores; **C:** Paired t-test between task phases for memory task group 1 (two-tailed,  $\alpha = 0.05$ ). Connected dots are from one participant; **D:** Paired t-test between task phases for memory task group 2 (two-tailed,  $\alpha = 0.05$ , Bonferroni corrected for 3 comparisons). Connected dots are from one participant; **E:** Z-scored O-scores, fraction of participants with significant O-scores and frequency distributions for Catch-after-retrieval and Visual task phases using a lenient lower frequency boundary. The lower frequency boundary was reduced from a period of 1/3 of the time series to 2 times the time series' length (i.e. 6 times lower). Statistical comparison of the O-score as in the main text. ns: not significant; \*:  $0.05 \geq p > 0.01$ ; \*\*:  $0.001 \geq p > 0.001$ ; \*\*\*:  $p \leq 0.0001$ .



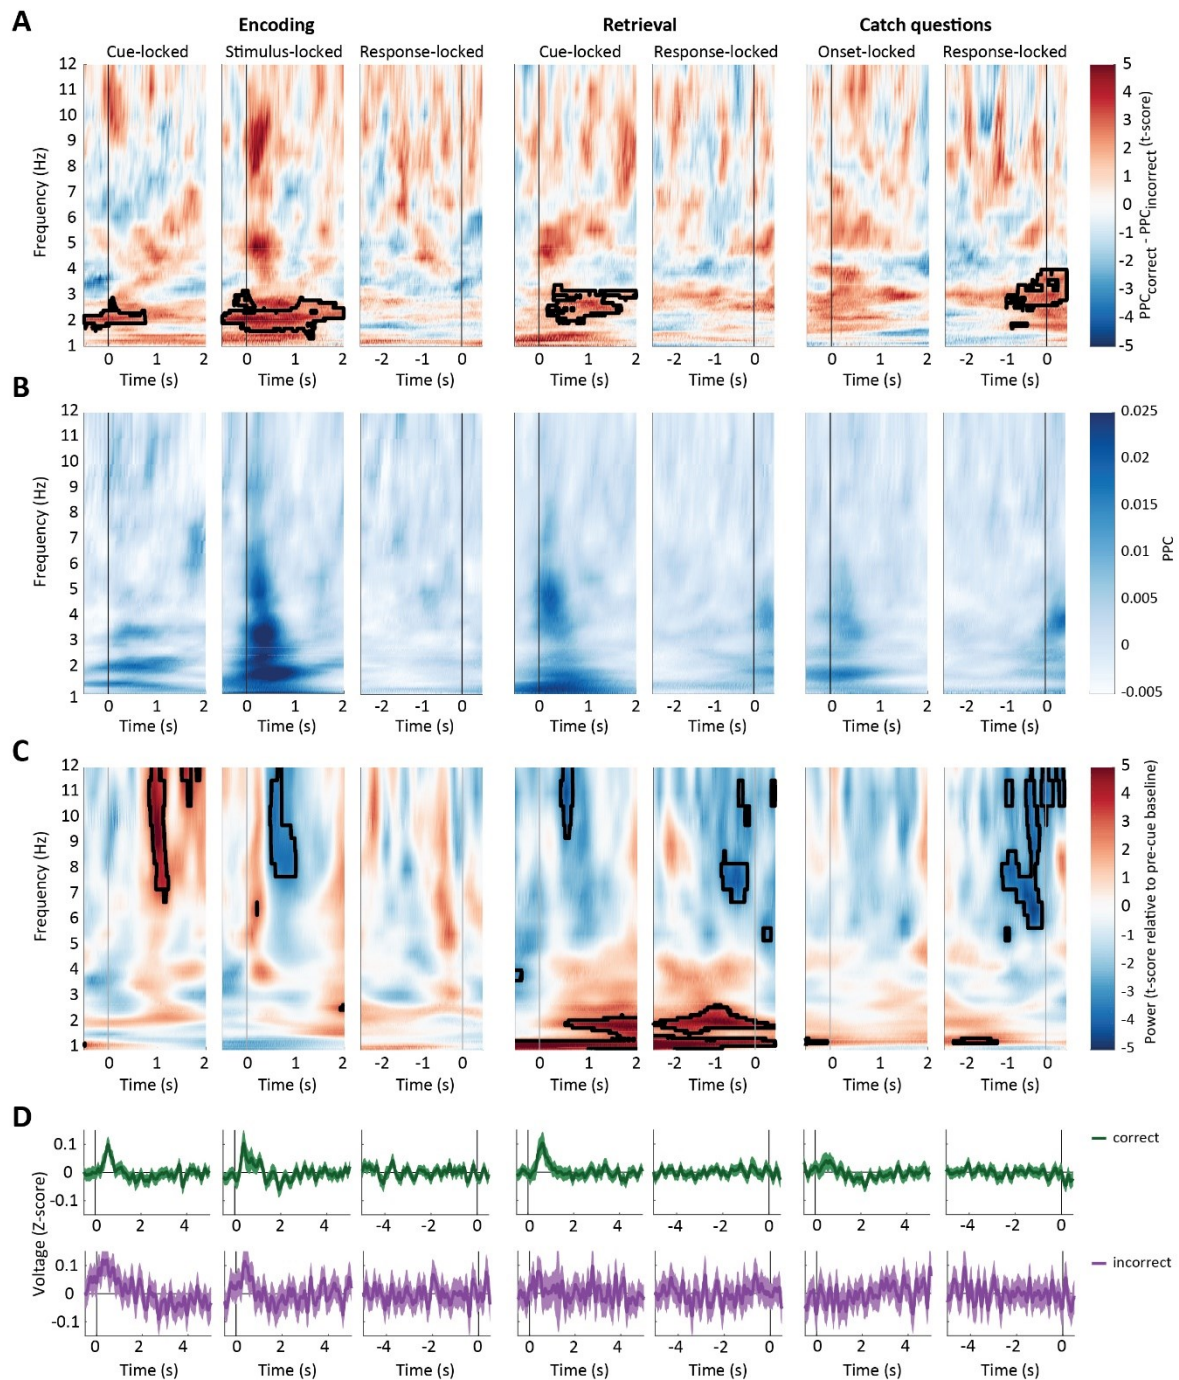

**Figure S4 - part 1.** Supplementary data for Pairwise Phase Consistency (PPC) analyses from Figure 5. **A:** PPC for correct versus incorrect trials (t-scored, color-coded). Black outlines indicate significance ( $\alpha = 0.05$ ) compared to a reference distribution with permuted trial-labels; **B:** Averaged raw PPC values for correct trials across all subjects. Significant PPC increases (see Figure 5B) are accompanied by increases in raw PPC; **C:** Average power changes relative to baseline for correct trials across all subjects; **D:** Event-related potentials (ERPs) for correct (green, top row) and incorrect trials (purple, bottom row). Voltage traces were Z-scored per trial relative to pre-cue baseline and averaged across trials, channels and subjects. Solid lines show the smoothed (50 ms kernel) mean voltage and shaded areas indicate the standard error of the mean. All panels show data from encoding trials (left, cue-, stimulus- and response-locked), retrieval trials (middle, cue- and response-locked) and catch questions (onset- and response-locked), with vertical black lines indicating  $t = 0$  s.



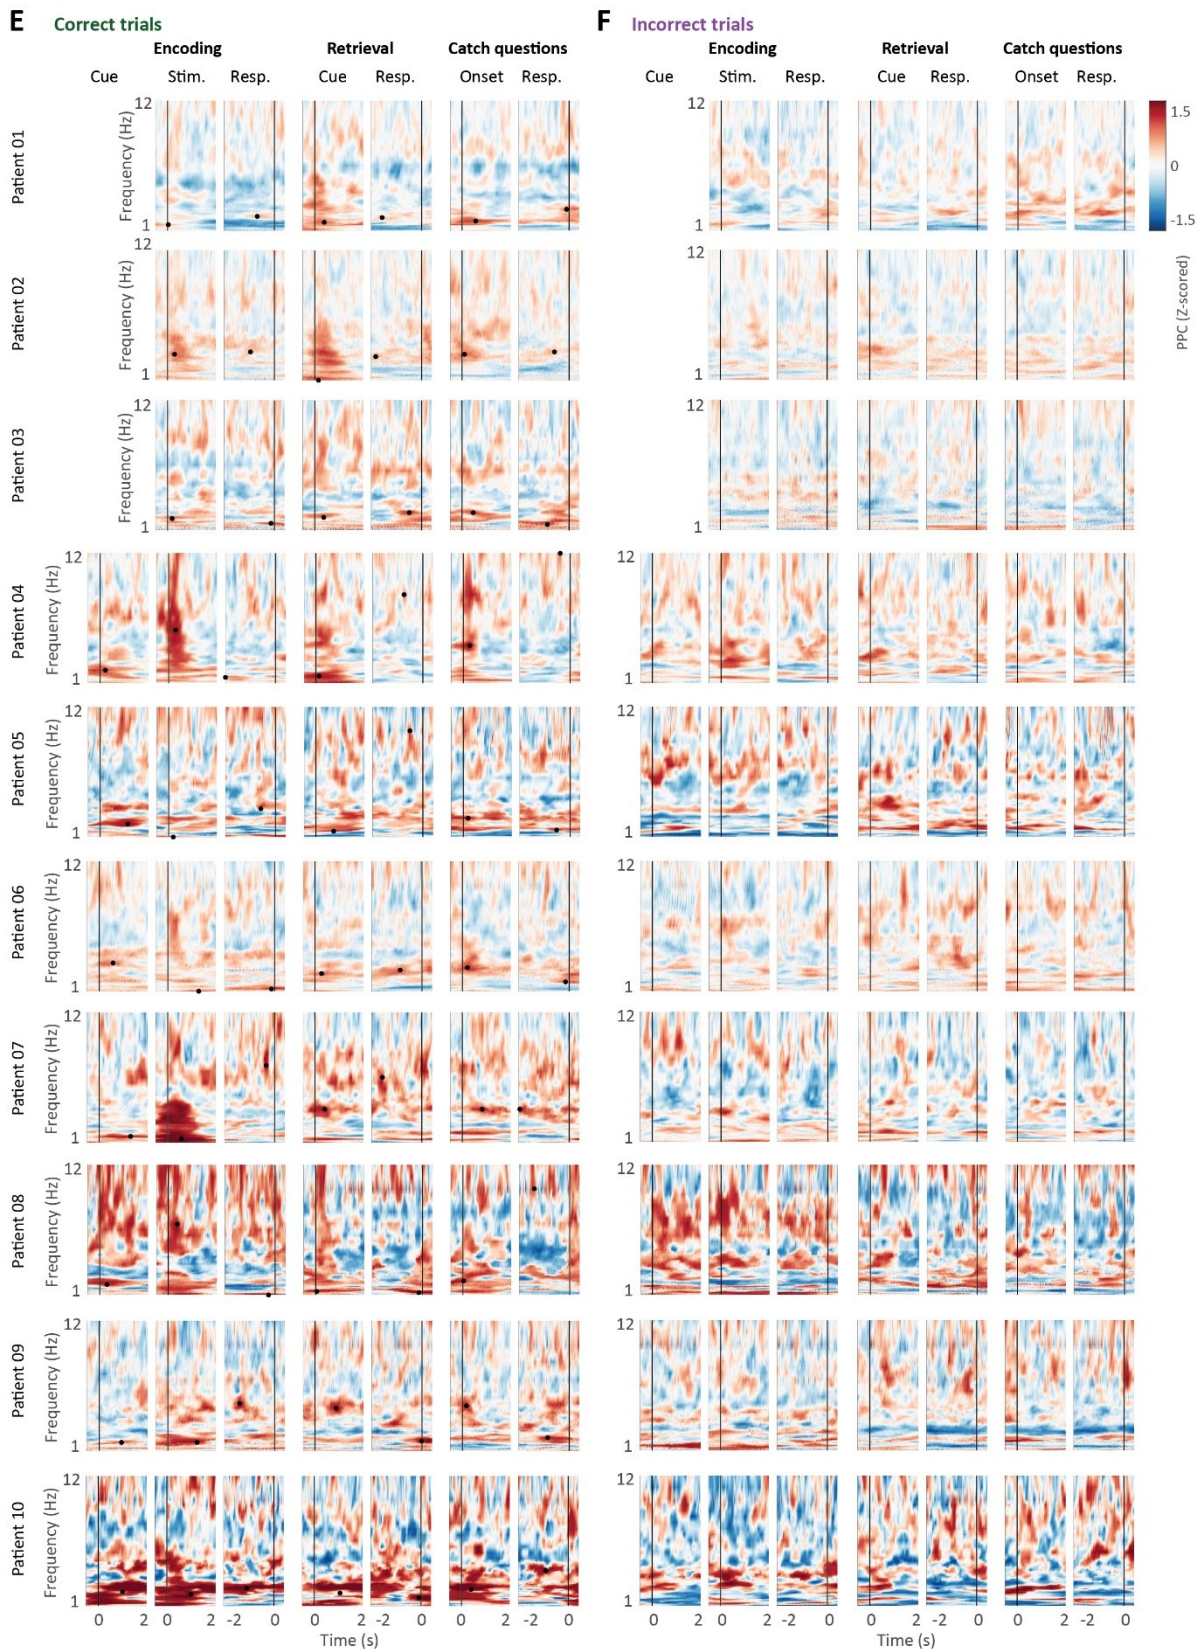

**Figure S4 – part 2.** Average Pairwise Phase Consistency (PPC), Z-scored relative to pre-cue baseline (color-coded) for each of the 10 intracranial EEG patients for correct (E) and incorrect trials (F), and locked to cue onset, stimulus onset and response for encoding trials, cue onset and response for retrieval trials, as well as for catch question onset and response.

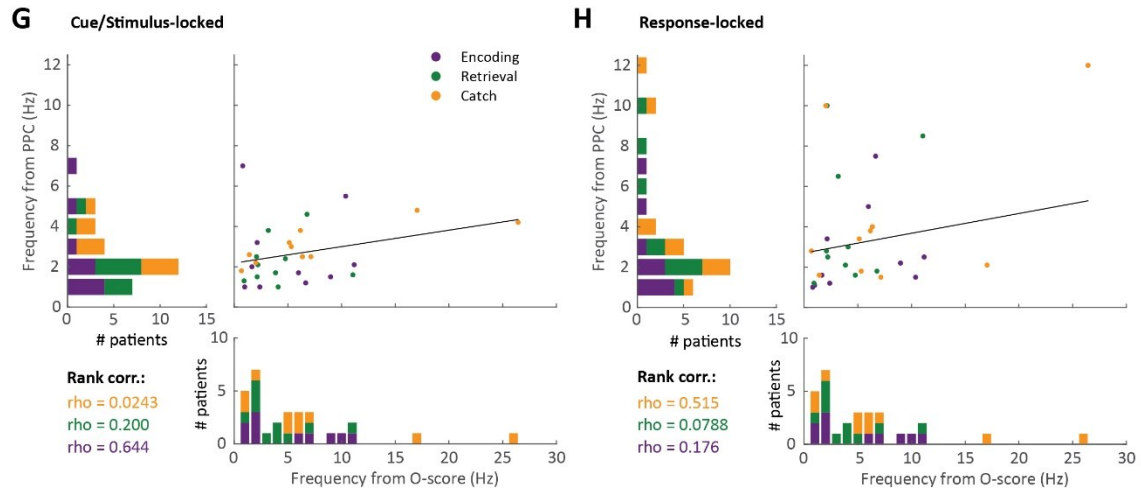

**Figure S4 – part 3.** Supplementary data to phase analyses in Figure 5 and comparison of O-score analyses with peak PPC frequencies. **G&H:** Scatter plots and histograms of the peak frequencies identified by the O-score (horizontal axes) and the peak PPC (vertical axes) for cue/stimulus locked analyses (G) and response-locked analyses (H) of the PPC, and for encoding (purple), retrieval (green) and catch (yellow) phases separately. The Spearman rank correlation is given for each task phase separately in the same color code.

### 3. Supplementary Methods: Simulated data for validation of O-score method

To test the applicability and performance of the O-score method for our data we ran a series of simulations. In these simulations, we produced model data with and without oscillations, i.e. with a known ground truth, and computed O-scores in the same way as reported for the behavioral data. This allowed us to test whether the O-score method is able to detect oscillations of different strengths in a noisy dataset, as well as reject data with no oscillation included. In addition, it allowed us to compare the O-score's ability to detect oscillations for datasets with different characteristics, such as average response times, with each other. To this end, we modelled data that matched the response distributions, the number of responses and the number of included participants from the encoding and visual task phases.

Response data were simulated as a Poisson process, i.e.:

$$P_{\text{resp}}(t \rightarrow t + \Delta t) = r(t) \Delta t,$$

with  $P_{\text{resp}}$  the chance of a response occurring at the time interval  $t$  to  $t + \Delta t$ ,  $r(t)$  the 'firing rate' at time  $t$  and  $\Delta t$  the time step, set to  $\Delta t = 0.0005$  s. The firing rate function  $r(t)$  was modelled as:

$$r(t) = N_{\text{spikes}}^s r_{\text{trend}}^s(t) r_{\text{osc}}(t),$$

i.e. as the product of the total number of spikes  $N_{\text{spikes}}$ , an overall trend function  $r_{\text{trend}}(t)$  and an oscillatory function  $r_{\text{osc}}(t)$ , of which the former two factors were varied between model participants  $s$ , introducing noise in the data set. The total number of spikes was drawn from a normal distribution, the mean and SD of which were matched by the behavioral data (Table S3) and with a minimum of 10 spikes.

For the visual task phase, the firing rate function  $r_{\text{trend}}(t)$  was modelled using a gamma probability density function, while the trend for the encoding task phase was modelled using a normal probability density function and the retrieval task phase with a lognormal distribution. The length of the time series was varied between model participants and was drawn from a uniform distribution. The parameters for the probability density functions are given in Table S8.

To introduce the oscillation, we used:

$$r_{\text{osc}}(t) = A \sin(2\pi f_{\text{osc}} t),$$

with  $f_{\text{osc}}$  the frequency of the oscillation, which was set to 2.5, 5, 7.5, 10 and 15 Hz, and  $A$  the amplitude, varying between 0 (i.e. no oscillation) and 1 (i.e. 100% modulation of response rate within each period), in steps of 0.1. The results for a range of  $f_{\text{osc}}$  and  $A$  is given for both model task phases in Figure S5.

**Table S8.** Parameters of the model data. See Supplementary Methods for details.

| Task phase: | # model participants | # spikes Mean $\pm$ SD: | $r_{\text{trend}}(t)$ : |             |         |             |          |                |
|-------------|----------------------|-------------------------|-------------------------|-------------|---------|-------------|----------|----------------|
|             |                      |                         | Pdf function            | Parameter 1 |         | Parameter 2 |          | Total time (s) |
| Encoding    | 190                  | 66 $\pm$ 34             | Normal                  | Mean:       | 1.5-2.5 | St dev:     | 2.5-3.5  | 4-12 s         |
| Retrieval   | 70                   | 151 $\pm$ 54            | Lognormal               | Mean:       | 0-1     | St dev:     | 1-1.5    | 4-12 s         |
| Visual      | 95                   | 215 $\pm$ 54            | Gamma                   | Shape:      | 1-2     | Scale:      | 0.25-0.5 | 1.5-4.5 s      |

#### 4. Supplementary Results: Validation of O-score method

We simulated data resembling the encoding, retrieval and visual task phases in terms of the number of participants, reaction time distributions and number of responses per participant, with various levels of oscillatory modulation. Some example simulations are given in Figure S5A. Similar to the analyses on the observed data, we computed the O-score for each simulated participant. To aid comparison with Figure 3 of the main text, we report the distributions of O-scores across participants (mean and standard deviation given in the top rows of Figure S5 B-D), and the number of participants reaching the significance threshold (bottom rows of Figure S5 B-D). We also computed second level statistics and report whether the results are significant at  $\alpha = 0.01$ . Finally, we computed frequency histograms across significant O-scores (middle rows of Figure S4 B-D).

The results in Figure S5 provide us with two important validations. Firstly, we observe that O-scores were low and did not reach significance when no or weak oscillatory modulations were applied, and this was the case for each of the 3 task phases. This suggests that the O-score analysis is not likely to provide spurious results when an oscillation is not present or is too weak to be detected.

Conversely, for stronger oscillations, O-scores became significant for each of the three task phases, and the fraction of participants with significant O-scores went up markedly. Importantly, when the O-score analysis indicated significance at the population level, then the peak frequencies were overwhelmingly detected at the correct frequency (red dotted lines in Figure S5 indicate a 2 Hz frequency band around the ground truth frequency).

The oscillation amplitude at which the significance threshold was reached differed per task phase, with a low threshold of 20-30% modulation sufficient for Retrieval and a high 50-60% required for Encoding. This differentiation is expected given the large differences in response density between the task phases, with extremely low response densities for Encoding (i.e. few responses over a long timeframe). We note that O-scores remained non-significant and the fraction of significant participants was low when the oscillation frequency was expected to be undetectable given the characteristics of the data set, again suggesting spurious results are unlikely. This occurred for the 15 Hz oscillation for Encoding, due to low response density and corresponding reduction in the upper frequency bound. O-scores also dropped for low oscillation frequencies for the Visual task, due to the short response timeframe and corresponding increase in lower frequency bound. The latter drop in O-score could be 'rescued' by increasing the maximum detectable oscillation period (i.e. minimum frequency) for the standard  $1/3^{\text{rd}}$  of the timeframe to 2 times the response timeframe (yellow Figure S5D), confirming the validity of the analyses shown in Figure 3E.



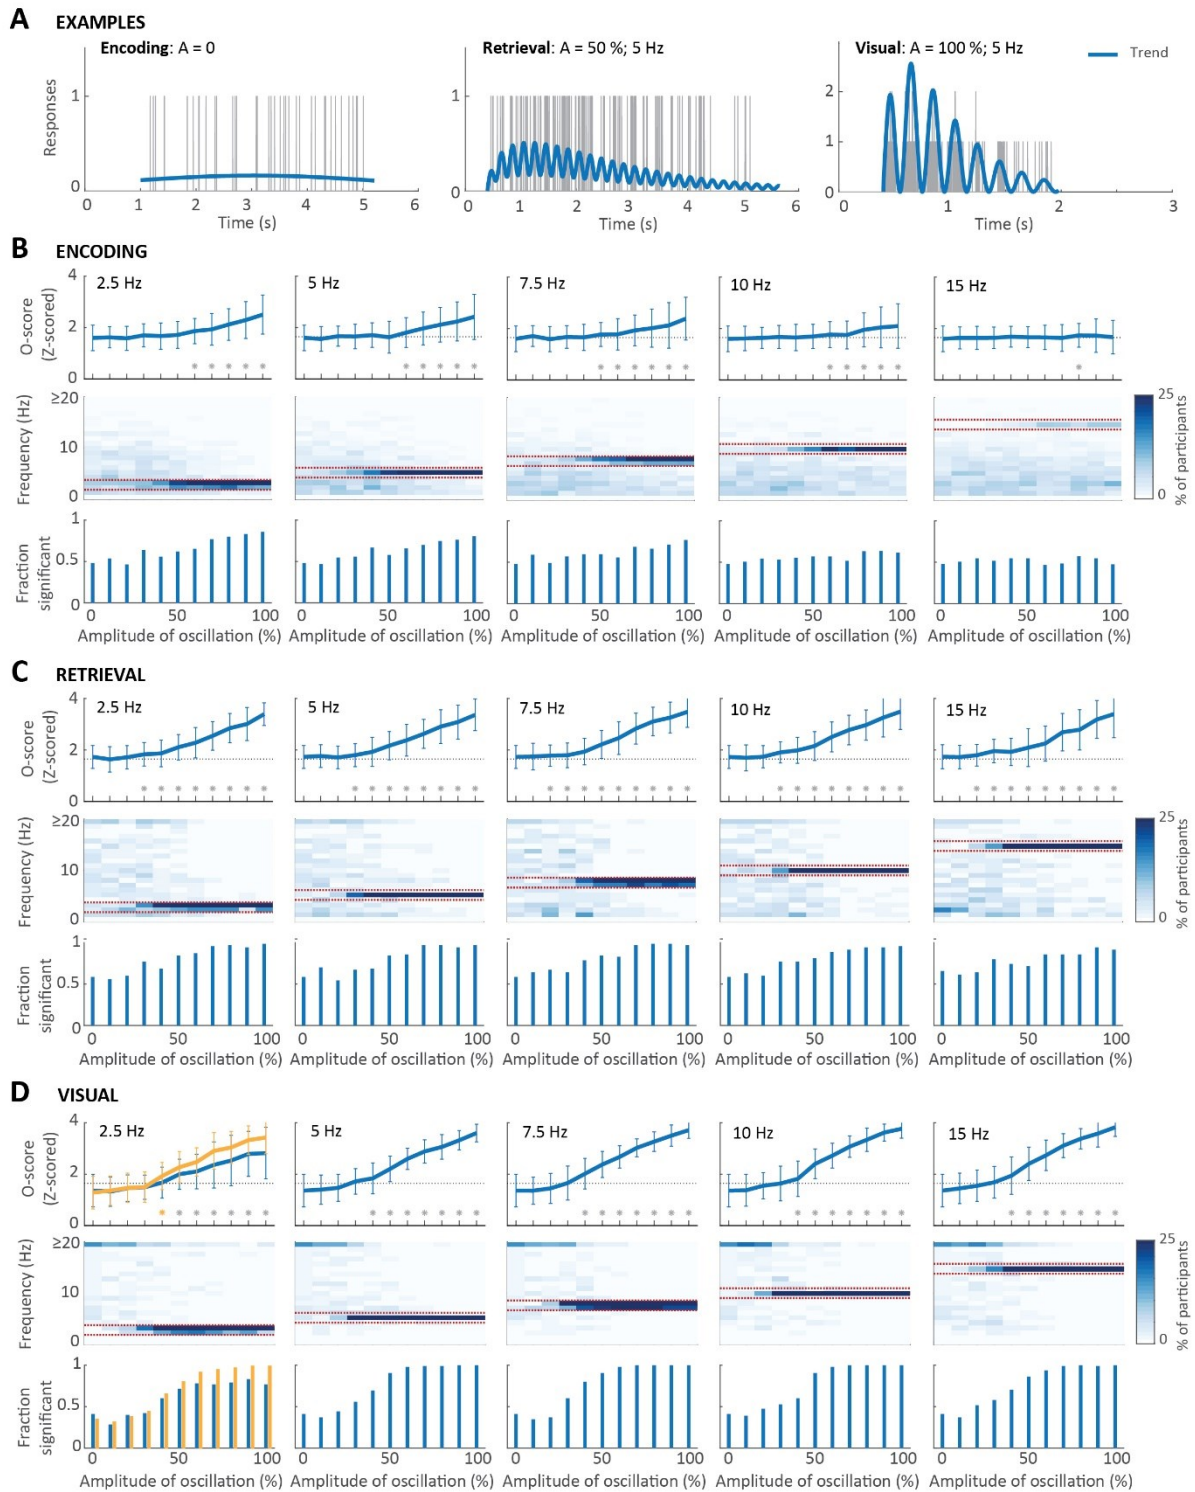

**Figure S5.** O-scores for simulated data for Encoding (B), Retrieval (C) and Visual (D), covering a range of oscillation amplitudes (x-axes; 0 % = no oscillation; 100 % = complete modulation), for 5 frequencies (left to right): 2.5, 5, 7.5, 10 and 15 Hz. **A:** Example traces, with trend curves in blue and response traces in grey. **B-D:** For each task phase, we show the Z-scored O-score (top row, mean  $\pm$  standard deviation, \* indicate significance for population at  $\alpha = 0.01$ ), frequency histogram per amplitude (middle row, color-coded, note: y-axis truncated at 20 Hz) and fraction of participants with significant O-scores (bottom row). In D, results of an additional simulation are shown for 2.5 Hz, where the lower frequency bound for O-score computation was reduced by a factor 6 (yellow).
